1 **Title: Applications of a Novel Reciprocating Positive Displacement Pump in the Simulation**  
2 **of Pulsatile Arterial Blood Flow**

3

4 **Authors: Adam Menkara<sup>1</sup>, Ahmad Faryami<sup>1</sup>, Daniel Viar<sup>2</sup>, Dr. Carolyn A Harris<sup>1,3</sup>**

5 1 Department of Biomedical Engineering, Wayne State University, Detroit, MI 48202

6 2 Department of Computer Science and Engineering, University of Toledo, Toledo, Ohio,  
7 43606

8 3 Carolyn A Harris, Ph.D. (corresponding author), Wayne State University Dept. of  
9 Chemical Engineering and Materials Science, 6135 Woodward Avenue, Rm 3120,  
10 Detroit, MI 48202

11 \* Corresponding author

12 E-mail: [caharris@wayne.edu](mailto:caharris@wayne.edu)

## 13 **Abstract**

14 Pulsatile arterial blood flow plays an important role in vascular system mechanobiology,  
15 especially in the study of mechanisms of pathology. Limitations in cost, setup time, sample size,  
16 and control across current in-vitro and in-vivo methods prevent future exploration of novel  
17 treatments. Presented is the verification of a novel reciprocating positive displacement pump  
18 aimed at resolving these issues through the simulation of human ocular, human fingertip and skin  
19 surface, human cerebral, and rodent spleen organ systems. A range of pulsatile amplitudes,  
20 frequencies, and flow rates were simulated using pumps made of 3D printed parts incorporating  
21 a tubing system, check valve and proprietary software. Volumetric analysis of 430 total readings  
22 across a flow range of 0.025ml/min to 16ml/min determined that the pump had a mean absolute  
23 error and mean relative error of 0.041 ml/min and 1.385%, respectively. Linear regression of  
24 flow rate ranges yielded  $R^2$  between 0.9987 and 0.9998. Waveform analysis indicated that the  
25 pump could recreate accurate beat frequency for flow ranges above 0.06ml/min at 70BPM. The  
26 verification of accurate pump output opens avenues for the development of novel long-term in-  
27 vitro benchtop models capable of looking at fluid flow scenarios previously unfeasible, including  
28 low volume-high shear rate pulsatile flow.

## 29 **Keywords**

30 Low volume flow, In Vitro Modelling, Human ocular blood flow, Human fingertip blood flow,  
31 Human cerebral blood flow, Splenic blood flow, Rodent blood flow

## 32 **Background**

33 Pulsatile arterial blood flow has been shown to have inherent properties that are integral to the  
34 normal function of specific organ and tissue systems[1,2]. The ability to generate pulsatile flow  
35 is important in the development of in-vitro models to simulate real-life conditions. However,  
36 many modern fluidic devices resort to utilizing constant or harmonic-based fluid flow. This is  
37 especially true in low volume conditions due to limitations in producing physiologically accurate  
38 low volume flow[3].

39 While extremely useful when studying systemic impact, animal studies are limited in their ability  
40 to directly and simultaneously mimic human physiologic arterial blood flow. These studies are  
41 also usually very time-intensive to setup and are limited in the range of physiologic and  
42 pathophysiologic scenarios that can be measured and tested dynamically. In-vitro models  
43 maintain control and dynamic recording potential. However, significant cost and time investment  
44 required to build, verify, and validate a test setup prior to conducting flow based biomechanistic  
45 in-vitro studies limits their usage.

46 This study presents the testing and verification of a novel positive displacement pump and  
47 operating program through the simulation of literature-based blood flow data of organ systems  
48 spanning human ocular, human fingertip and skin surface, human cerebral, and rodent spleen.  
49 These blood flow data span arbitrarily defined low (0ml/min – 0.4ml/min), mid (0.4ml/min –  
50 1.3ml/min) and high (3ml/min – 16ml/min) flow rate ranges aimed to provide flow rate  
51 performance for different flow applications. The use of a syringe-based positive displacement  
52 method of driving fluid flow in conjunction with the precise control of programmable input  
53 variables through a user interface allow for the generation of a wide-range of pulsatile low  
54 volume fluid flow rates and waveforms. Furthermore, the incorporation of a robust check valve  
55 system enables the ability for the pump to automatically reset back to its original position  
56 allowing the pump to function in long term fluid flow experiments.

## 57 **Materials and Methods**

### 58 **Reciprocating Positive Displacement Pump**

59 The body of each reciprocating positive displacement pump is comprised of 3D printed parts  
60 made of polylactic acid plastic (PLA) manufactured using an Anycubic I3 Mega printer  
61 (Anycubic Technology CO., Limited, HongKong)[4]. The design consists of five 3ml syringes  
62 per pump, allowing flow output from five total channels per pump (Fig 1.). A stepper motor,  
63 linear bearings, motor coupler, and lead screw assembled in line with each channel allow for the  
64 conversion of rotational motion into linear movement.

65 **Fig 1. Reciprocating Positive Displacement Pump.** Front view (a) and rear view (b) of fully  
66 assembled reciprocating positive displacement pump

67 A proprietary software allowing for the direct input through a simple user interface of user  
68 profile variables consisting of output bulk volume rate, pulsation frequency, and pulsation  
69 amplitude was developed using Python. Based on user input per profile, rotational speed and  
70 duration were calculated by the software. Mechanical inefficiencies of the pump and other  
71 components were account for through the program. This information is then sent to an Arduino-  
72 based board which is then interpreted and used to drive stepper motor movement. Each Arduino-  
73 based board is capable of simultaneously running three pumps, a total of 15 channels per board.  
74 An automatic sterilization function was also built within the program consisting of a constant

75 reciprocating action of the pump for a total of 20 minutes, cycling 99% isopropyl alcohol  
76 throughout the duration of the cleaning function. This is followed by three cycles of deionized  
77 water to expel any remaining isopropyl alcohol from the tubing system.

78 Once the syringes have reached their fully compressed state, the program then automatically  
79 resets the pump back to its original position, extending the syringes fully. The use of individual  
80 check valves immediately after the output from the syringes enables this retracting motion of the  
81 pump to automatically refill the syringes. This retraction time takes a total of approximately  
82 eight seconds. Each check valve limits the chances of cross-contamination between sample  
83 outputs and between input and output within each channel. Luer locking fittings used by the  
84 check valves and syringes allowed for simple and robust fluidic connections between all  
85 components. Input and output for each individual channel consisted of 50cm 3mm inner diameter  
86 silicone tubing into their respective check valves.

### 87 **Systolic Time Interval**

88 An important variable in the accuracy of individual pulsations is systolic time interval. An  
89 analogous representation of ventricular systolic time interval is created through the  
90 implementation of the systole time user input variable. This allows for direct control over beat  
91 cycle length independent of volume rate or frequency. Ideally, beat cycle duration can be  
92 approximately equal to two times the input systole time, although external variables such as  
93 system compliance may affect this.

### 94 **Amplitude**

95 Amplitude of individual pulsations is based on the multivariable user input per profile.  
96 Amplitude is directly correlated to volume rate and compliance of the tubing and flow system,  
97 and inversely correlated to both systole time and beat frequency. The dampening factor is a  
98 representation of compliance of the entire tubing system, and refers to the tubing system itself,  
99 attached chambers to the tubing and fluid viscosity. All these variables such as tubing diameter  
100 can be manipulated to better fit the intended modelling parameters. The full relationship between  
101 these variables and their effects on amplitude can be seen in Equation 1:

$$102 \quad \blacktriangleright \text{Amplitude} \left( \frac{\text{ml}}{\text{min}} \right) = \frac{\text{Volume rate} \left( \frac{\text{ml}}{\text{min}} \right) \times \frac{60 \text{ seconds}}{\text{min}}}{\text{Systole time (seconds)} \times \text{Heart rate} \left( \frac{\text{Beats}}{\text{min}} \right)} \times \text{Dampening Factor}$$

103 The incorporation of a method of simply and directly manipulating pulsatile amplitude allows for  
 104 the freedom to explore domains of clinical applications previously unexplored.

### 105 **Testing Parameters**

106 In our previous study, the accuracy of the reciprocating positive displacement pump was  
 107 demonstrated across a range of 0.01ml/min to 0.7ml/min with an R<sup>2</sup> value of 0.9998[5]. To  
 108 expand the verified flow rate range and investigate the capabilities of the pump in novel  
 109 applications of arterial blood flow in organ systems, a literature search was conducted collecting  
 110 flow rate data spanning three ranges; low (0ml/min – 0.4ml/min), mid (0.4ml/min – 1.5ml/min)  
 111 and high (3ml/min – 16ml/min) bulk flow rates. The organ systems used to populate these  
 112 arterial blood flow ranges are human ocular, human fingertip, human cerebral, and rodent spleen  
 113 (Table 1). Unless otherwise noted, an input of 70BPM and 0.1 second systolic time were used for  
 114 all human simulations and 380BPM and 0.054 second systolic time for all rat-based  
 115 simulations[6–8]. While any heartrate within physiologic domain could have been selected, an  
 116 average resting 70BPM for humans and 380BPM for rats was chosen unless otherwise specified.  
 117 Systolic time was not provided in any study simulated throughout the flow ranges, therefore  
 118 requiring the use of arbitrary systolic times of 0.1 seconds for human and 0.054 seconds for rat-  
 119 based simulations.

120 **Table 1. Organ systems scenarios and corresponding flow rate, beat rate, and systolic time**  
 121 **input profiles into reciprocating positive displacement pump**

| <b>Input Flow Profile for each organ system, measuring device and condition</b> | <b>Flow Rate (ml/min)</b> | <b>Beat Rate (BPM)</b> | <b>Systolic Time (seconds)</b> | <b>Reference</b> |
|---------------------------------------------------------------------------------|---------------------------|------------------------|--------------------------------|------------------|
| <b>Low Flow Range (0ml/min – 0.4ml/min)</b>                                     |                           |                        |                                |                  |
| <b>Fingertip blood flow autoregulation (post-caffeine)</b>                      | 0.029±0.004               | 71                     | 0.1                            | [9]              |
| <b>Retinal Blood Flow by Laser Doppler Velocimetry</b>                          | 0.033                     | 70                     | 0.1                            | [10,11]          |
| <b>Fingertip Blood Flow by Venous-occlusion volume plethysmography (lower)</b>  | 0.056                     | 70                     | 0.1                            | [12]             |

|                                                                                                                |             |     |       |         |
|----------------------------------------------------------------------------------------------------------------|-------------|-----|-------|---------|
| <b>Fingertip blood flow autoregulation (pre-caffeine)</b>                                                      | 0.067±0.009 | 74  | 0.1   | [9]     |
| <b>Retinal Blood Flow by Laser Doppler Velocimetry</b>                                                         | 0.08 ±0.012 | 70  | 0.1   | [13]    |
| <b>Fingertip blood flow autoregulation (baseline)</b>                                                          | 0.088±0.015 | 76  | 0.1   | [9]     |
| <b>Fingertip Blood Flow by Venous-occlusion volume plethysmography (Critical vasoconstriction Temperature)</b> | 0.2         | 70  | 0.1   | [12]    |
| <b>Retinal Blood Flow by Phase Contrast MRI</b>                                                                | 0.261±0.087 | 70  | 0.1   | [14]    |
| <b>Mid Flow Range (0.4ml/min – 1.4ml/min)</b>                                                                  |             |     |       |         |
| <b>Fingertip Blood Flow by Venous-occlusion volume plethysmography</b>                                         | 0.42        | 70  | 0.1   | [12]    |
| <b>Total Pulsatile Ocular Blood Flow by MRI (lower)</b>                                                        | 0.444       | 70  | 0.1   | [14]    |
| <b>Rat Splenic Arteriovenous Flow Differential in Rats (<i>pre-caudal ligation</i>)</b>                        | 0.6±0.1     | 380 | 0.054 | [15]    |
| <b>Splenic Arteriovenous Flow Differential in Rats (<i>pre-caudal ligation</i>)</b>                            | 0.8±0.3     | 380 | 0.054 | [15]    |
| <b>Total Pulsatile Ocular Blood Flow by MRI (upper)</b>                                                        | 0.803       | 70  | 0.1   | [14]    |
| <b>Ocular Choroidal Blood Flow by MRI</b>                                                                      | 0.917±0.281 | 70  | 0.1   | [14]    |
| <b>Total Pulsatile Ocular Blood Flow by Langham Pneumotonometer</b>                                            | 1           | 70  | 0.1   | [16,17] |
| <b>Splenic Arteriovenous Flow Differential in Rats (<i>post-caudal ligation</i>)</b>                           | 1.0±0.2     | 380 | 0.054 | [15]    |
| <b>Splenic Arteriovenous Flow Differential in Rats (<i>post-rostral ligation</i>)</b>                          | 1.2±0.1     | 380 | 0.054 | [15]    |
| <b>High Flow Range (3ml/min – 16ml/min)</b>                                                                    |             |     |       |         |
| <b>Middle Meningeal Artery</b>                                                                                 | 6±3         | 70  | 0.1   | [18]    |
| <b>Ophthalmic Artery</b>                                                                                       | 11±5        | 70  | 0.1   | [18]    |

123 These systolic times are used as a representation of true systolic time, however changes in  
124 systolic times can be made for direct manipulation of pulsatile amplitude independent of flow  
125 volume rate and beat rate. Degassed, deionized water, measured and verified at 1 gram/milliliter  
126 of water at room temperature, was used to measure the accuracy and precision of pump output. A  
127 total of 10, ten-minute weight measurements were performed across 10 pump channels using the  
128 pump and tubing setup schematic seen in Fig 2. per input user profile. The sterilization function  
129 described earlier was used to properly clean and prime pumps before each testing session.  
130 Individual beakers were used per channel, weighed after the time period of each test was  
131 completed. Weight measurements were conducted using a Mettler Toledo AT261 DeltaRange  
132 Analytical Balance (Mettler-Toledo, LLC, USA).

133 **Fig 2. Schematic diagram of testing setup.** Illustrates flow of fluids and data collection  
134 locations of user input verification

135 Each individual profile tested also had flow data obtained from a flow sensor placed at the  
136 immediate output of a channel check valve for each individual profile tested. The flow sensor  
137 used to collect flow data was Sensirion SLF06 series flow sensor (Sensirion AG, Switzerland).  
138 Flow data was used to determine consistency of amplitude and volume rate within the same test,  
139 accurate beat rate throughout the duration of each test, and differences of volume rate and  
140 amplitude across different profiles.

## 141 **Results**

### 142 **Volumetric Analysis**

143 The pump was able to simulate the volumetric flow rates for the low, mid, and high bulk flow  
144 rate ranges spanning a total range of 0.025ml/min to 16ml/min for the organ systems of the  
145 human eye, human fingertip and skin surface, rat spleen and human cerebral blood flow rates  
146 (Fig 3, Table 2).

147 **Fig 3. Expected vs. Measured low, mid, and high bulk flow rate ranges.** Illustrates the  
148 expected versus mean of measured volume rate across 10 channels for low flow ranges (0ml/min  
149 – 0.4ml/min) (a), mid flow ranges (0.4ml/min – 1.4ml/min) (b), and high flow ranges (3ml/min –  
150 16ml/min) (c) with a linear function showing a regression and  $R^2$  value for each plot

151 **Table 2 – Verified organ systems explored in this paper within achievable range of**  
 152 **reciprocating positive displacement pump**

| <b>Organ System</b>                                    | <b>Minimum Input Flow Rate (<math>\frac{ml}{min}</math>)</b> | <b>Maximum Input Flow Rate (<math>\frac{ml}{min}</math>)</b> | <b>Pump Achieves Physiologic Flow</b> |
|--------------------------------------------------------|--------------------------------------------------------------|--------------------------------------------------------------|---------------------------------------|
| <b>Retinal Blood Flow</b>                              | 0.033                                                        | 0.348                                                        | Yes                                   |
| <b>Ocular Choroidal Blood Flow</b>                     | 0.636                                                        | 1.198                                                        | Yes                                   |
| <b>Total Pulsatile Ocular Blood Flow</b>               | 0.444                                                        | 1                                                            | Yes                                   |
| <b>Fingertip Blood Flow</b>                            | 0.025                                                        | 0.42                                                         | Yes                                   |
| <b>Splenic Arteriovenous Flow Differential in Rats</b> | 0.5                                                          | 1.3                                                          | Yes                                   |
| <b>Ophthalmic Artery</b>                               | 6                                                            | 16                                                           | Yes                                   |
| <b>Middle Meningeal Artery</b>                         | 3                                                            | 9                                                            | Yes                                   |

153  
 154 Across the entire range of flow rates, a total of 430 ten-minute weight measurements taken from  
 155 the pumps had a mean absolute error and mean relative error of 0.040854 ml/min and  
 156 1.385164% respectively. The linear regression of the low, mid, and high flow rate ranges (Fig 3,  
 157 a-c, respectively) tested yielded R<sup>2</sup> values 0.9998, 0.9988 and 0.9987, respectively. The standard  
 158 deviation across the total range of 0.025ml/min to 16ml/min was 0.00151ml/min to  
 159 0.14196ml/min presented in Fig 4(a). Relative standard deviation indicates the pumps' precision  
 160 across the range of tested flow rates (Fig 4(b)). A novel verified range for pump input parameters  
 161 can be seen in Table 3.

162 **Fig 4. Standard Deviation across full bulk flow rate range.** Illustrates the standard  
 163 deviation(a) and relative standard deviation(b) across full range of tested flow ranges

164 **Table 3 – Verified pulsation rate, volume rate and amplitude range achievable by the**  
 165 **reciprocating positive displacement pump**



| Category                                       | Minimum | Maximum | Capable of Achieving? |
|------------------------------------------------|---------|---------|-----------------------|
| <b>Pulsation Rate</b> ( $\frac{Beats}{min}$ )  | 1       | 400     | Yes                   |
| <b>Output Volume Rate</b> ( $\frac{ml}{min}$ ) | 0.01    | 16      | Yes                   |
| <b>Amplitude</b> ( $\frac{ml}{min}$ )          | 0.02    | 65      | Yes                   |

166

### 167 **Pulsatile Flow**

168 Flow measurements from the pump illustrated accurate pulsatile flow according to beat rate and  
 169 volume rate in humans and rats (Fig 5-7). Flow rates under 0.06ml/min with an input of 70BPM  
 170 were too small and were unable to simulate accurate 70BPM pulsatile waveform flow.

171 Therefore, waveforms presented in Fig 5 (a-c) do not have the correct beat counts in the relative  
 172 time frames, although the pump remains volumetrically correct due to inbuilt catchup functions  
 173 within the proprietary program. However, A total of ~23 total beats were counted across the 20  
 174 seconds displayed for all other displayed flow patterns, equating to the input value of ~70BPM.

175 **Fig 5. Low flow range pulsatile waveform patterns.** Visual representation of flow waveform  
 176 pattern of mean flow in order from lowest to highest bulk volume rate simulated in low flow rate  
 177 range; effects of caffeine on fingertip blood flow autoregulation (post-caffeine) (a), retinal blood  
 178 flow by laser doppler velocimetry (b), fingertip blood flow by venous occlusion  
 179 plethysmography (c), effects of caffeine on fingertip blood flow autoregulation (pre-caffeine)  
 180 (d), retinal blood flow by laser doppler velocimetry (e), effects of caffeine on fingertip blood  
 181 flow autoregulation (baseline) (f), critical vasoconstriction temperature for fingertip blood flow  
 182 (g), retinal blood flow by phase contrast MRI (h)

183 **Fig 6. Mid flow range pulsatile waveform patterns.** Visual representation of flow waveform  
 184 pattern of mean flow in order from lowest to highest bulk volume rate simulated in mid flow rate  
 185 range; fingertip blood flow by venous occlusion plethysmography (a), total pulsatile ocular blood  
 186 flow by phase contrast MRI (b), splenic arteriovenous flow differential in rats (pre-caudal  
 187 ligation) (c), splenic arteriovenous flow differential in rats (pre-rostral ligation) (d), total pulsatile  
 188 ocular blood flow by phase contrast MRI (e), ocular choroidal blood flow by phase contrast MRI  
 189 (f), total pulsatile ocular blood flow by Langham pneumotonometer (g), splenic arteriovenous  
 190 flow differential in rats (post-caudal ligation) (h), splenic arteriovenous flow differential in rats  
 191 (post-rostral ligation) (i)

192 **Fig 7. High flow range pulsatile waveform patterns.** Visual representation of flow waveform  
193 pattern of mean flow in order from lowest to highest bulk volume rate simulated in high flow  
194 rate range; Middle meningeal Artery (a), Ophthalmic Artery (b)

195 To better illustrate the effects of input volume changes on individual pulsation amplitude and  
196 pattern, Fig 8 (a-d) illustrates a 1 second, single beat comparison of mean, upper and lower flow  
197 rate limits of standard deviation of measurement in ocular choroidal, total pulsatile ocular, and  
198 retinal blood flow rates. One second, single beat comparisons were not shown for organ system  
199 simulations where flow rates dropped below 0.06ml/min, waveform amplitudes exceeded the  
200 flow rate limit of the flow sensor used (65ml/min), or similarity in single beat waveforms made  
201 the subsequent graph unclear. Fig 9 illustrates the direct simulation done using the reciprocating  
202 pump of retinal blood flow rates patterns from previous literature, matching fluid rise times, peak  
203 amplitude, and total beat time similar to the Figure presented by Rebhan et. al[19].

204 **Fig 8. Visualization of single second pulsatile waveform patterns.** Visual Representation of  
205 comparison of lower, mean, and upper limits of flow waveform patterns across 1 second for  
206 choroidal blood flow rates (a), total pulsatile ocular blood flow measurements (b), retinal blood  
207 flow gathered through MRI (c), retinal blood flow gathered using Laser Doppler velocimetry (d)

208 **Fig 9. Waveform pattern simulation.** Visual representation of simulation using reciprocating  
209 pump of one-second flow waveform patterns of retinal blood flow in a healthy, diabetic, and  
210 glaucoma patient scenarios generated from a computational framework

211

212 In the simulation seen in Fig 7 (b), very high flow rates (above 6ml/min) were high enough to  
213 require the use of the reciprocating action of the pump before the full 20 seconds has elapsed,  
214 requiring the pump to return to its original, fully retracted position state and explains the lack of  
215 pulsatile flow across the full 20 seconds.

## 216 **Discussion**

217 Using the testing setup, volumetric analysis of pump output was accurate within a standard  
218 deviation range of 0.00151ml/min to 0.14196ml/min through the low (0ml/min – 0.4ml/min),  
219 mid (0.4ml/min – 1.3ml/min) and high (3ml/min – 16ml/min) bulk flow rate ranges within the  
220 organ systems tested (Fig 3). Through this, the pump has shown to provide accurate flow in  
221 ranges in which the development of mechanistic in-vitro models and products requires. Although  
222 specific organ systems were used to define the flow ranges tested, these simulations for organ

223 systems are used as example vascular bodies and the versatility of the pump expands beyond  
224 these examples. This versatility is also created through the implementation of the reciprocating  
225 action of the pump once syringe limits have been reached. The reciprocating action of the pump  
226 takes approximately eight seconds and stops flow for that duration of time. However, the total  
227 bulk flow output, beat frequency and time input of flow are not affected.

228 This is one way in which the reciprocating positive displacement pump system distinguishes  
229 itself, making it ideal for use in long term fluid modeling scenarios where output variables from  
230 the model are dependent on input pulsatile flow. The use of the proprietary program along with  
231 its ability to take in user input for heart rate, volume rate and amplitude, also employs a user-  
232 input time variable where the program can calculate the exact number of pulsations within the  
233 input time frame and executing them, excluding time of retraction. This in turn, allows for  
234 precision in long term applications of the pump and makes the versatility of pump applications  
235 span much wider than the organ systems described throughout this paper, although the  
236 applications within the organ systems are vast in themselves.

### 237 **Human Ocular and Retinal Blood Flow**

238 Unlike previous pump flow systems, non-harmonic pulsatile flow can be achieved, through the  
239 manipulation of volume rate, beat rate and amplitude. This means that low volume pulsatile flow  
240 simulations are no longer limited by the method of simulating them, but rather the accuracy of  
241 the measurement method itself and its application, assuming it is within the achievable range of  
242 the pump. This can be seen through the successful simulation of multiple methods of measuring  
243 retinal and total pulsatile ocular blood flow seen in Table 1 and Fig 3. Individual pulsations  
244 utilizing our reciprocating pump are also capable of being simulated at low flow rates, through  
245 the manipulation of BPM and amplitude input. This allowed the pump to reproduce the  
246 individual pulsations of blood flow through the human retina seen in Fig 9. Previous literature  
247 has shown that flow shear stress is an important indicator of vascular disease[20,21]. Our pump,  
248 with its ability to directly manipulate flow amplitude, a key component to shear stress in arteries,  
249 provides an avenue in which its incorporation into a flow based in-vitro model can provide  
250 comprehensive insight into the role shear stress plays in retinal disorders. The use of this system  
251 in conjunction with an integrated in-vitro model of the human eye does not need to be confined  
252 within the domain of the retina. The successful simulation of choroidal blood flow rates and

253 waveforms makes the pump ideal to be integrated into an in-vitro model, an example an in-vitro  
254 investigation of retinal detachment. Retinal detachment has been shown to be correlated to  
255 central ocular choroidal blood flow with atrophy of the retinal pigment epithelium[22]. Because  
256 of current limitations in the simulation of low volume fluid flow models, static in-vitro models  
257 with short perfusion times are often resorted to when looking at this phenomenon[23]. The  
258 pumps implementation in in-vitro models can provide a more comprehensive understanding of  
259 the effects of blood flow on retinal detachment and other diseases. Innovations in vascular  
260 development and perfusion methods for future in-vitro models can further increase model  
261 accuracy and applicability of the pump. One early possibility can be seen through the  
262 development of optical vascular structures developed using optical coherence tomography[24].  
263 The pulsatile nature of the fluid flow has yet to be accounted for in an in-vitro setup involving  
264 the human eye, although waveform dynamics have been shown to affect patient outcome in  
265 specific scenarios[25].

## 266 **Human Fingertip and Skin Surface Blood Flow**

267 The reciprocating positive displacement pump is also capable of simulating fingertip and skin  
268 surface blood flow under varying physiologic and pathophysiologic scenarios. An example  
269 application within this specific vascular domain is in the bioprinting of skin grafts for burn  
270 victims, where functional vascular endothelial cells require perfusion with a peristaltic  
271 pump[26]. The use of peristaltic pumps has been compared to harmonic wave flow because of its  
272 low peak-to-peak amplitude per pulse and lack of a significant flow drop between pulsations[27].  
273 Pulsatile shear rate has been shown to increase the proliferation of vascular endothelial cells,  
274 meaning the implementation of the reciprocating positive displacement pump in a cell perfusion  
275 setup used for 3D printed cells can perhaps improve the rate and complexity at which vasculature  
276 develops, and in turn accelerate the progression towards a viable bio-printed skin-graft[23,28].  
277 Not only can the increased shear rates of output fluid flow affect the rate at which vascular tissue  
278 develops, but also the contents of the fluids used to perfuse the cellular structure. In our setup,  
279 the simple silicone tubing system used alongside the reciprocating positive-displacement pump  
280 allows for a vast array of fluids with physiologic or pathophysiologic makeup. An example fluid  
281 explored in the previous literature is cerebrospinal fluid (CSF), where the reciprocating positive  
282 displacement pump can be used to model pulsatile flow, shear rate, shear stress, and amplitude

283 simultaneous to variations in CSF composition as this is directly relevant to pathologic states like  
284 those in hydrocephalus[5,29].

### 285 **Splenic Blood Flow in Rats**

286 Non-human simulations using our pump are presented because of possible limitations in the  
287 collection of flow data in humans in-vivo and in turn, limitations of data for a range of organ  
288 systems. Animal models are the main alternative to in-vitro modeling; although useful in their  
289 ability to model systemic effects and device compatibility, are time-intensive to setup, limited in  
290 the range of conditions testable, and whose flow conditions may not map to humans linearly.  
291 Modeling animal flow rates gives us flexibility to eliminate unknown variables, and perhaps may  
292 reflect on human data if there are anatomical similarities between species. An example of this  
293 within this organ system domain are splenic baroreceptors and their control over splenic afferent  
294 nerve activity[30]. Novel developments in carbon-based organic semiconductors can be  
295 implemented as an afferent nerve substitute where their efficacy relative to the original nerve in a  
296 rat-based in-vitro model with pulsatile fluid flow can be modeled by the reciprocating positive  
297 displacement pump[31].

### 298 **Human Cerebral Arterial Blood Flow**

299 The ability to isolate flow from different sources provides further versatility of the reciprocating  
300 positive displacement pump, as seen in the ophthalmic artery simulation as well as the total  
301 pulsatile ocular and retinal blood flow simulations presented in Table 1 and Fig 3. The use of  
302 anticancer chemotherapy drugs has been shown to have complications with many organs in the  
303 human body, one being the induction of ocular toxicity and other complications with the eye and  
304 retina[32,33]. Past in vitro models of the human eye used primary human retinal endothelial  
305 cells, employing relatively short perfusion times of chemotherapeutic agents[34]. The pump can  
306 act as a method to perfuse the cells over a much longer period and can be a more comprehensive  
307 in-vitro test with more accurate flow shear rates throughout treatment. The isolated effects of a  
308 chemotherapeutic drug can also be measured, through the pumps ability to isolate specific flow  
309 rates of different vascular systems and arteries and get a much more tailored flow modelling  
310 setup. The simulation of the middle meningeal artery has fewer applications for the simulation in

311 and of itself, although this additional application confirms that the pump is capable of simulating  
312 flow rates necessary for the study of disease not well implemented to date.

### 313 **Limitations of the Reciprocating Positive Displacement Pump**

314 The pump is required to retract back to its initial state and reset after a set time simulating  
315 pulsatile fluid flow depending on the volume flow rate input profile used. This retraction time,  
316 and in turn pause time on the induction of fluid flow, lasts around eight seconds in the current  
317 setup. Although this is a minimal pause in fluid flow production, future iterations of the pump  
318 and proprietary program design can significantly reduce this time to near zero ensuring a  
319 constant pulsatile fluid flow is delivered to a fluid setup or model being investigated. The current  
320 syringe volume of 3ml in the pump limits the range of higher flow rate models that can be  
321 simulated, something a peristaltic pump can achieve through the sequential addition of peristaltic  
322 pump outputs in series. This can be addressed in future iterations of the pump by increasing  
323 syringe volume or using the same approach as a sequential peristaltic pump system where  
324 combining channels of the same pump and channels from multiple pumps would deliver a  
325 significantly larger volume of pulsatile fluid flow.

### 326 **Conclusion**

327 In conclusion, the verification of the reciprocating positive displacement pump determined it was  
328 accurate in the simulation of arterial blood flow in human ocular, human fingertip and skin  
329 surface, human cerebral, and rodent spleen organ systems. This provides new freedom in the  
330 development of novel in-vitro benchtop models involving pulsatile fluid flow and can accelerate  
331 the development of translatable treatments to improve patient outcome.

### 332 **Declarations**

333 The authors have no conflicts to disclose.

334 **Funding:** Research reported in this publication was supported by the National Institute of  
335 Neurological Disorders and Stroke of the National Institutes of Health under award  
336 number R01NS094570, as well as Wayne State University internal funding. Approximately 30%  
337 of this project was financed with federal dollars. The content is solely the responsibility of the  
338 authors and does not necessarily represent the official views of the National Institutes of Health.

339

340

## 341 **References**

- 342 1. Rocha FG. Liver blood flow. Blumgart's Surgery of the Liver, Pancreas and Biliary Tract. Elsevier;  
343 2012. pp. 74-86.e5. doi:10.1016/B978-1-4377-1454-8.00004-7
- 344 2. SPAAN JAE, PIEK JJ, SIEBES M. Coronary Circulation and Hemodynamics. Heart Physiology and  
345 Pathophysiology. Elsevier; 2001. pp. 19–44. doi:10.1016/B978-012656975-9/50004-3
- 346 3. Squires TM, Quake SR. Microfluidics: Fluid physics at the nanoliter scale.
- 347 4. Faryami A, Menkara A, Viar D, Harris CA. Testing and validation of reciprocating positive  
348 displacement pump for benchtop pulsating flow model of cerebrospinal fluid production and  
349 other physiologic systems. PLOS ONE. 2022;17: e0262372. doi:10.1371/journal.pone.0262372
- 350 5. Faryami A, Menkara A, Viar D, Harris CA. Testing and Validation of Reciprocating Positive  
351 Displacement Pump for 2 Benchtop Pulsating Flow Model of Cerebrospinal Fluid Production and  
352 Other Physiologic. 2021. doi:10.1101/2021.12.26.474197
- 353 6. SPODICK DH. Normal Sinus Heart Rate: Appropriate Rate Thresholds for Sinus Tachycardia and  
354 Bradycardia. Southern Medical Journal. 1996;89: 666–667. doi:10.1097/00007611-199607000-  
355 00003
- 356 7. Li WY, Strang SE, Brown DR, Smith R, Silcox DL, Li S-G, et al. Atomoxetine changes rat's HR  
357 response to stress from tachycardia to bradycardia via alterations in autonomic function.  
358 Autonomic Neuroscience. 2010;154: 48–53. doi:10.1016/j.autneu.2009.11.003
- 359 8. Chang C-Y, Chang R-W, Hsu S-H, Wu M-S, Cheng Y-J, Kao H-L, et al. Defects in Vascular Mechanics  
360 Due to Aging in Rats: Studies on Arterial Wave Properties from a Single Aortic Pressure Pulse.  
361 Frontiers in Physiology. 2017;8. doi:10.3389/fphys.2017.00503
- 362 9. Merrill GF, Costea DM, Sharp VA. Caffeine and Pressure Flow Autoregulation. World J Cardiovasc  
363 Dis. 2019;09: 253–266. doi:10.4236/wjcd.2019.94023
- 364 10. Riva CE, Grunwald JE, Sinclair SH, Petrig BL. Blood velocity and volumetric flow rate in human  
365 retinal vessels. Invest Ophthalmol Vis Sci. 1985;26: 1124–32.
- 366 11. Williamson TH, Harris A. Ocular blood flow measurement. British Journal of Ophthalmology. BMJ  
367 Publishing Group; 1994. pp. 939–945. doi:10.1136/bjo.78.12.939
- 368 12. Rubinstein EH, Sessler DI. Skin-surface temperature gradients correlate with fingertip blood flow  
369 in humans. Anesthesiology. 1990;73: 541–5.
- 370 13. Feke GT, Tagawa H, Deupree DM, Goger DG, Sebog J, Weirer JJ. Blood Flow In the Normal Human  
371 Retina. Investigative Ophthalmology & Visual Science. 1989.
- 372 14. Maleki N, Dai W, Alsop DC. Blood flow quantification of the human retina with MRI. NMR in  
373 Biomedicine. 2011;24: 104–111. doi:10.1002/nbm.1564
- 374 15. Kaufman S, Lévassieur J. Effect of portal hypertension on splenic blood flow, intrasplenic  
375 extravasation and systemic blood pressure. 2003. doi:10.1152/ajpregu.00516.2002.-We

- 376 16. Claridge KG, James CB. Ocular pulse measurements to assess pulsatile blood flow in carotid  
377 artery disease. *British Journal of Ophthalmology*. 1994;78: 321–323. doi:10.1136/bjo.78.4.321
- 378 17. Langham ME, Farrell RA, O'Brien V, Silver DM, Schilder P. Blood flow in the human eye. *Acta*  
379 *Ophthalmologica*. 2009;67: 9–13. doi:10.1111/j.1755-3768.1989.tb07080.x
- 380 18. Zarrinkoob L, Ambarki K, Wåhlin A, Birgander R, Eklund A, Malm J. Blood flow distribution in  
381 cerebral arteries. *Journal of Cerebral Blood Flow and Metabolism*. 2015;35: 648–654.  
382 doi:10.1038/jcbfm.2014.241
- 383 19. Rebhan J, Parker LP, Kelsey LJ, Chen FK, Doyle BJ. A computational framework to investigate  
384 retinal haemodynamics and tissue stress. *Biomechanics and Modeling in Mechanobiology*.  
385 2019;18: 1745–1757. doi:10.1007/s10237-019-01172-y
- 386 20. Simon AC, Levenson J. Abnormal wall shear conditions in the brachial artery of hypertensive  
387 patients. *Journal of Hypertension*. 1990;8: 109–114. doi:10.1097/00004872-199002000-00003
- 388 21. Irace C, Carallo C, Crescenzo A, Motti C, de Franceschi MS, Mattioli PL, et al. NIDDM is associated  
389 with lower wall shear stress of the common carotid artery. *Diabetes*. 1999;48: 193–197.  
390 doi:10.2337/diabetes.48.1.193
- 391 22. Fontainhas AM, Townes-Anderson E. RhoA Inactivation Prevents Photoreceptor Axon Retraction  
392 in an In Vitro Model of Acute Retinal Detachment. *Investigative Ophthalmology & Visual Science*.  
393 2011;52: 579. doi:10.1167/iovs.10-5744
- 394 23. Potic J, Mbefo M, Berger A, Nicolas M, Wanner D, Kostic C, et al. An in vitro Model of Human  
395 Retinal Detachment Reveals Successive Death Pathway Activations. *Frontiers in Neuroscience*.  
396 2020;14. doi:10.3389/fnins.2020.571293
- 397 24. Maloca PM, Tufail A, Hasler PW, Rothenbuehler S, Egan C, Ramos de Carvalho JE, et al. 3D  
398 printing of the choroidal vessels and tumours based on optical coherence tomography. *Acta*  
399 *Ophthalmologica*. 2019;97. doi:10.1111/aos.13637
- 400 25. Tsai C-C, Kau H-C, Kao S-C, Lin M-W, Hsu W-M, Liu J-H, et al. Pulsatile ocular blood flow in  
401 patients with Graves' ophthalmopathy. *Eye*. 2005;19: 159–162. doi:10.1038/sj.eye.6701434
- 402 26. Liu X, Wang X, Zhang L, Sun L, Wang H, Zhao H, et al. A novel method for generating 3D  
403 constructs with branched vascular networks 2 using multi-materials bioprinting and direct  
404 surgical anastomosis 3 4. doi:10.1101/2021.03.21.436268
- 405 27. Bäuerle FK, Karpitschka S, Alim K. Living System Adapts Harmonics of Peristaltic Wave for Cost-  
406 Efficient Optimization of Pumping Performance. *Physical Review Letters*. 2020;124.  
407 doi:10.1103/PhysRevLett.124.098102
- 408 28. Levesque MJ, Nerem RM, Sprague EA. Vascular endothelial cell proliferation in culture and the  
409 influence of flow.
- 410 29. Khodadadei F, Liu AP, Harris CA. A high-resolution real-time quantification of astrocyte cytokine  
411 secretion under shear stress for investigating hydrocephalus shunt failure. *Communications*  
412 *Biology*. 2021;4: 387. doi:10.1038/s42003-021-01888-7



- 413 30. Moncrief K, Kaufman S. Splenic baroreceptors control splenic afferent nerve activity. *Am J Physiol*  
414 *Regul Integr Comp Physiol*. 2006;290: 352–356. doi:10.1152/ajpregu.00489.2005.-Stenosis
- 415 31. Sherwood CP, Elkington DC, Dickinson MR, Belcher WJ, Dastoor PC, Feron K, et al. Organic  
416 Semiconductors for Optically Triggered Neural Interfacing: The Impact of Device Architecture in  
417 Determining Response Magnitude and Polarity. *IEEE Journal of Selected Topics in Quantum*  
418 *Electronics*. 2021;27: 1–12. doi:10.1109/JSTQE.2021.3051408
- 419 32. Omoti AE, Omoti CE. Ocular toxicity of systemic anticancer chemotherapy. *Pharm Pract*  
420 (Granada). 2006;4: 55–9.
- 421 33. Al-Tweigeri T, Nabholtz J-M, Mackey JR. Ocular toxicity and cancer chemotherapy: A review.  
422 *Cancer*. 1996;78: 1359–1373. doi:10.1002/(SICI)1097-0142(19961001)78:7<1359::AID-  
423 *CNCR1*>3.0.CO;2-G
- 424 34. Steinle JJ, Zhang Q, Thompson KE, Toutouchian J, Yates CR, Soderland C, et al. Intra-Ophthalmic  
425 Artery Chemotherapy Triggers Vascular Toxicity through Endothelial Cell Inflammation and  
426 Leukostasis. *Investigative Ophthalmology & Visual Science*. 2012;53: 2439. doi:10.1167/iovs.12-  
427 9466
- 428

bioRxiv preprint doi: <https://doi.org/10.1101/2022.06.20.496802>; this version posted June 21, 2022. The copyright holder for this preprint (which was not certified by peer review) is the author/funder, who has granted bioRxiv a license to display the preprint in perpetuity. It is made available under aCC-BY 4.0 International license.

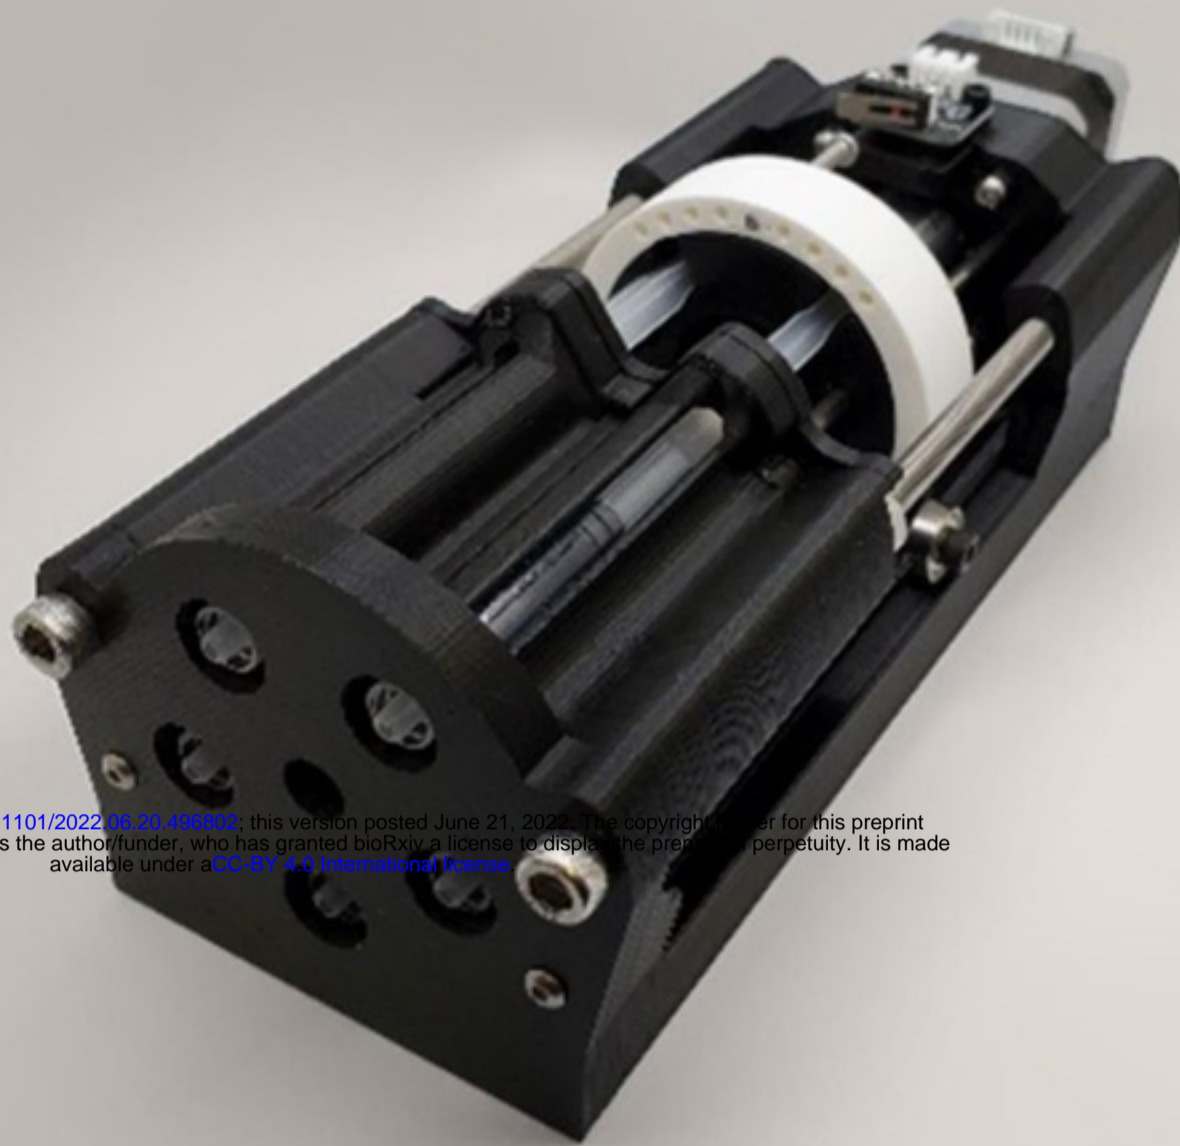

(a)

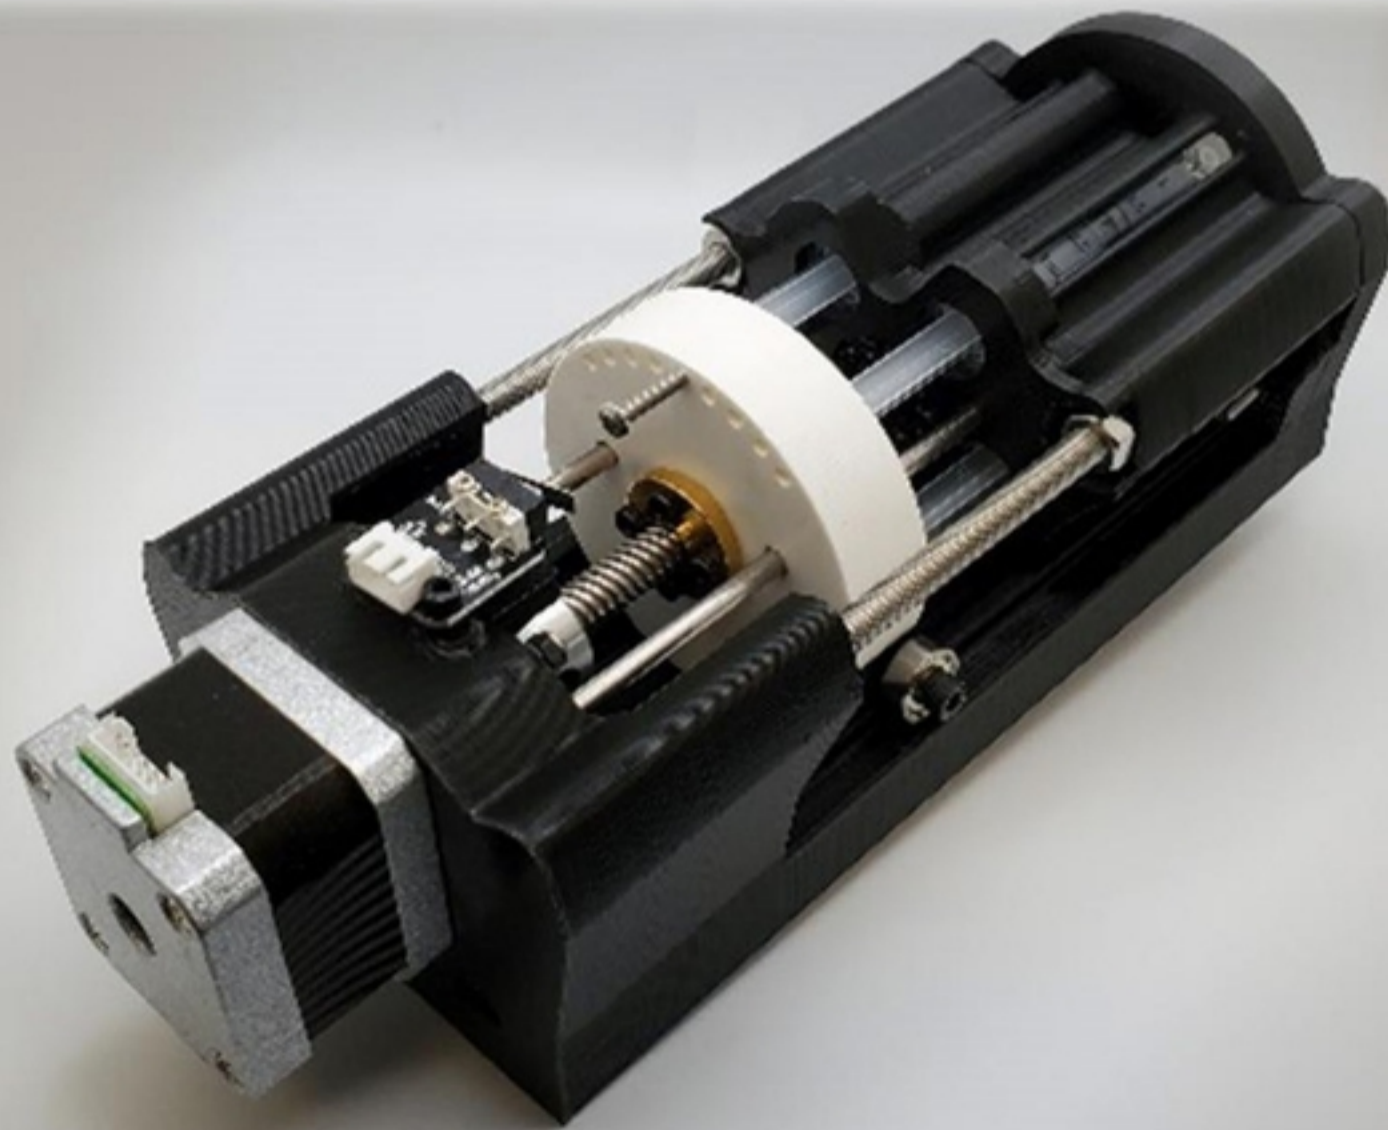

(b)

Figure 1

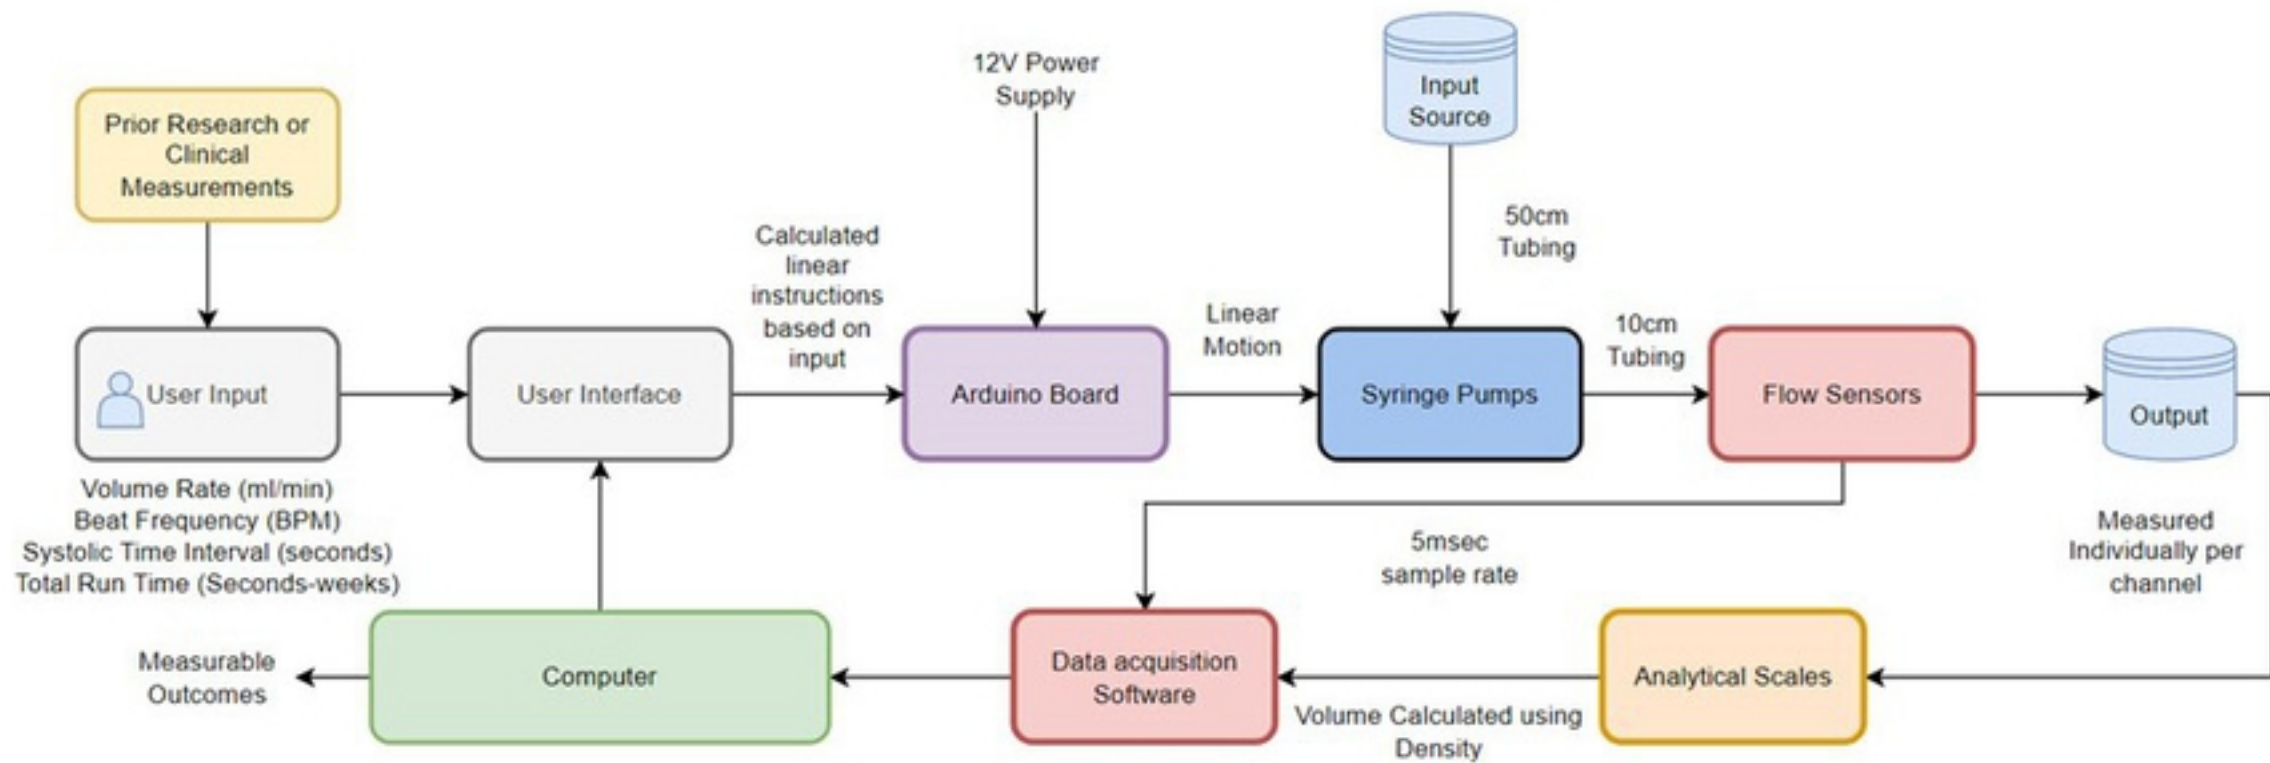

Figure 2

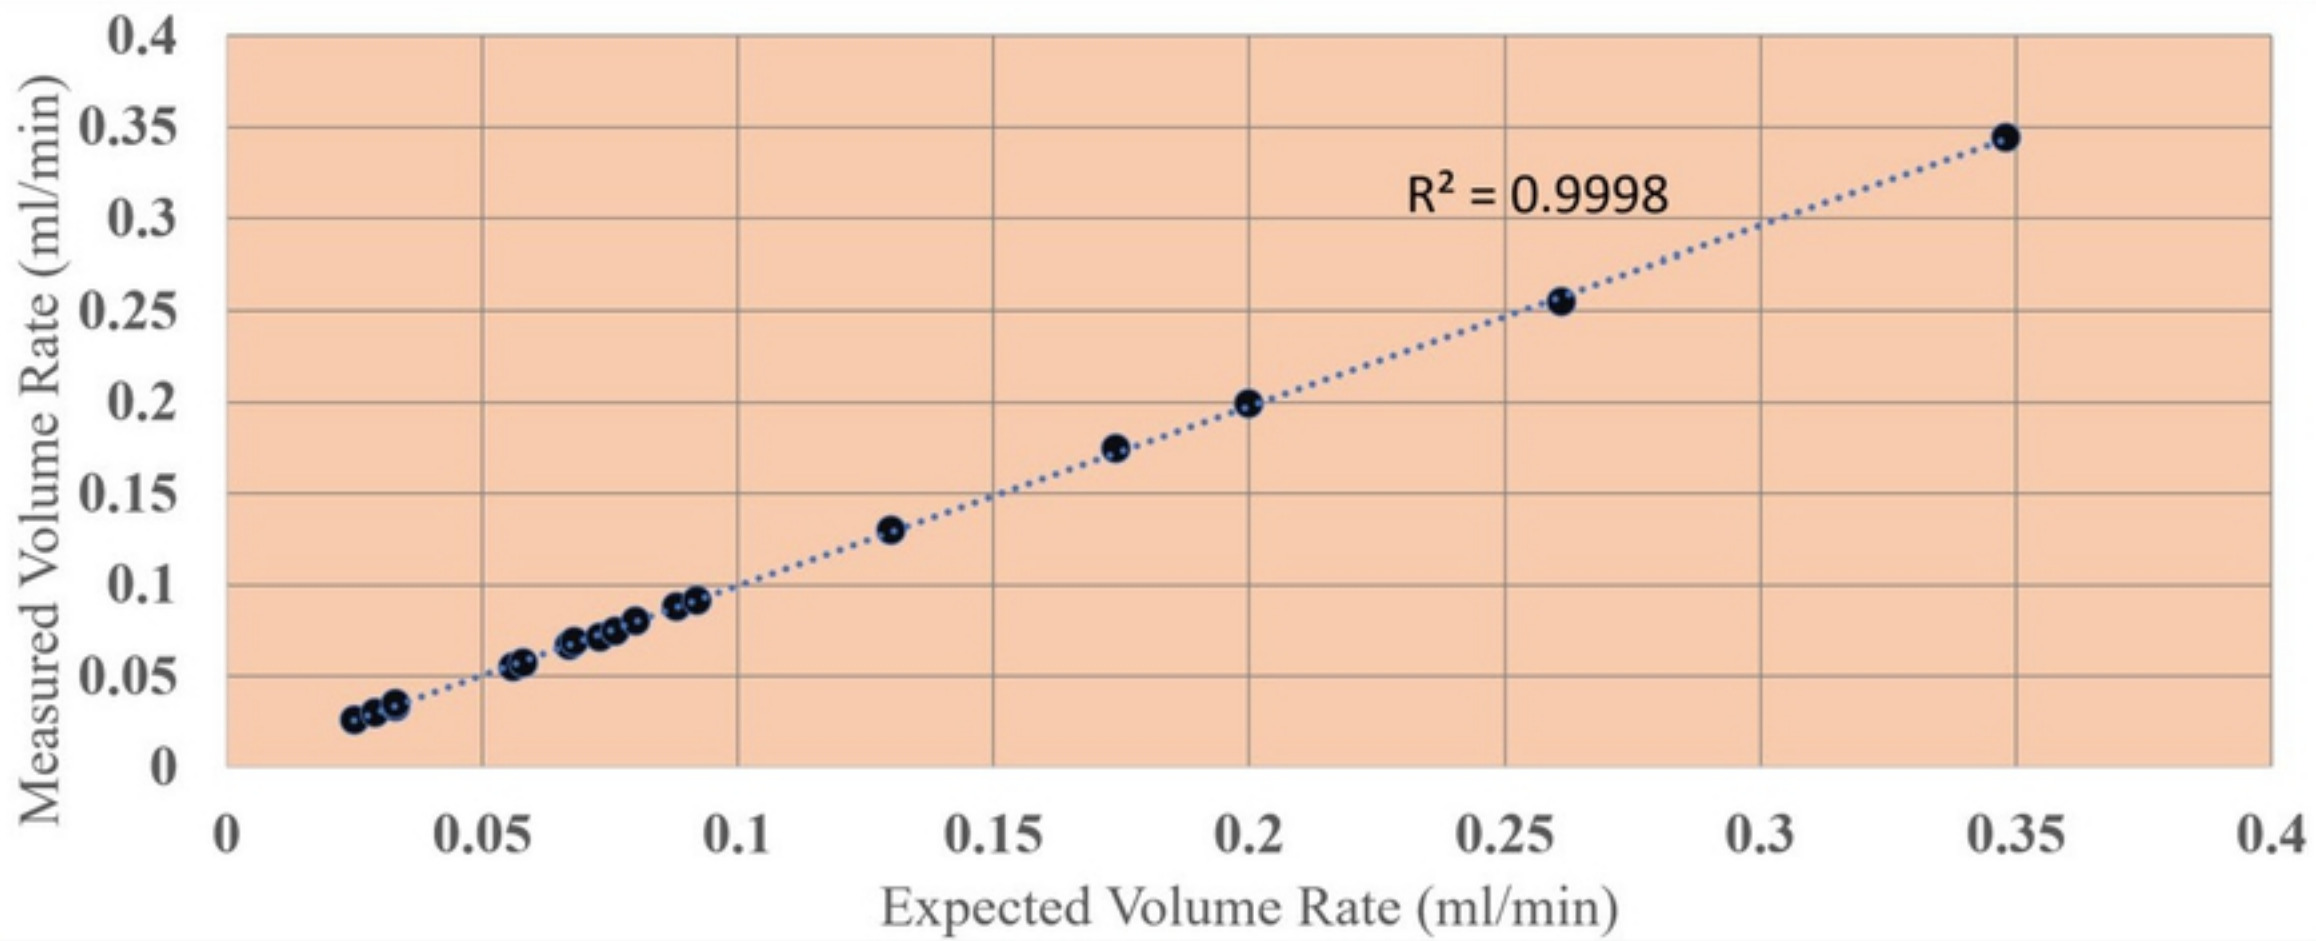

(a)

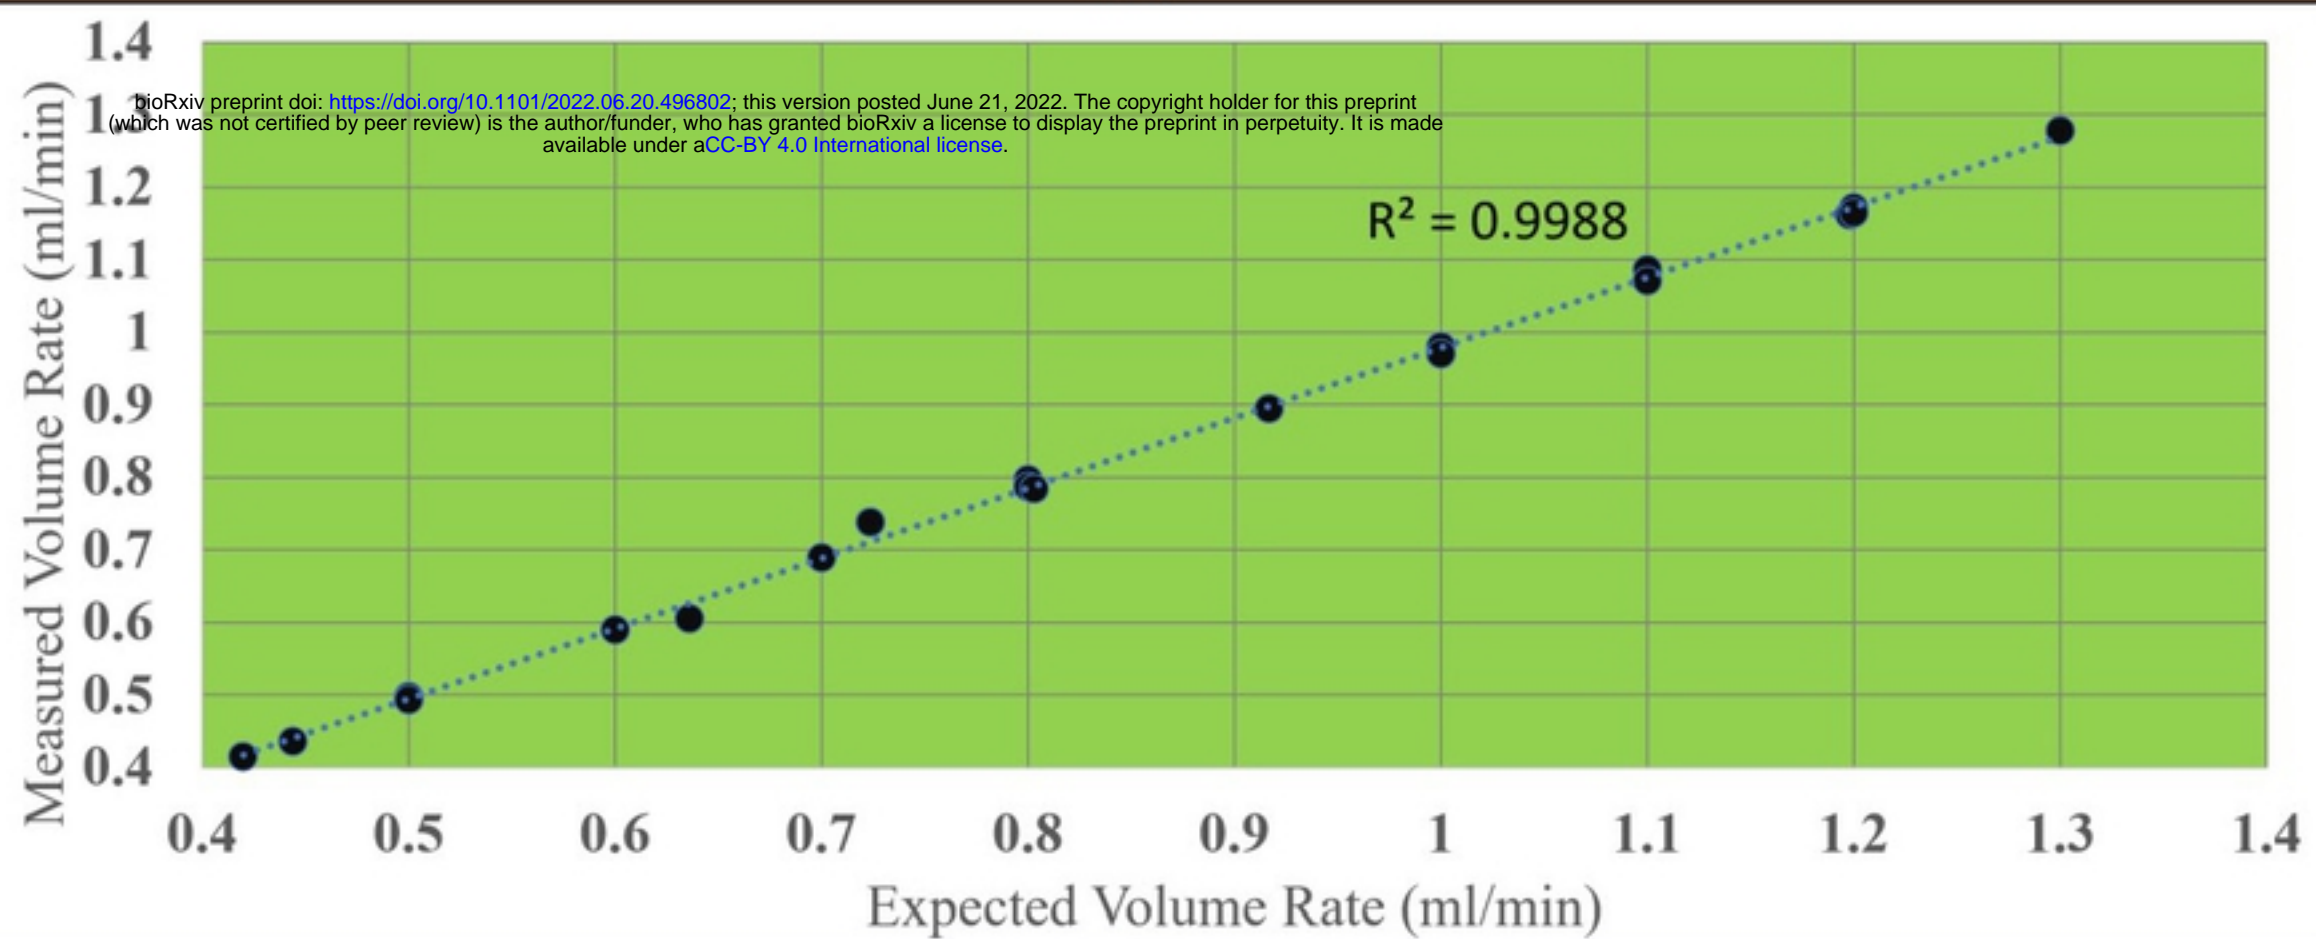

(b)

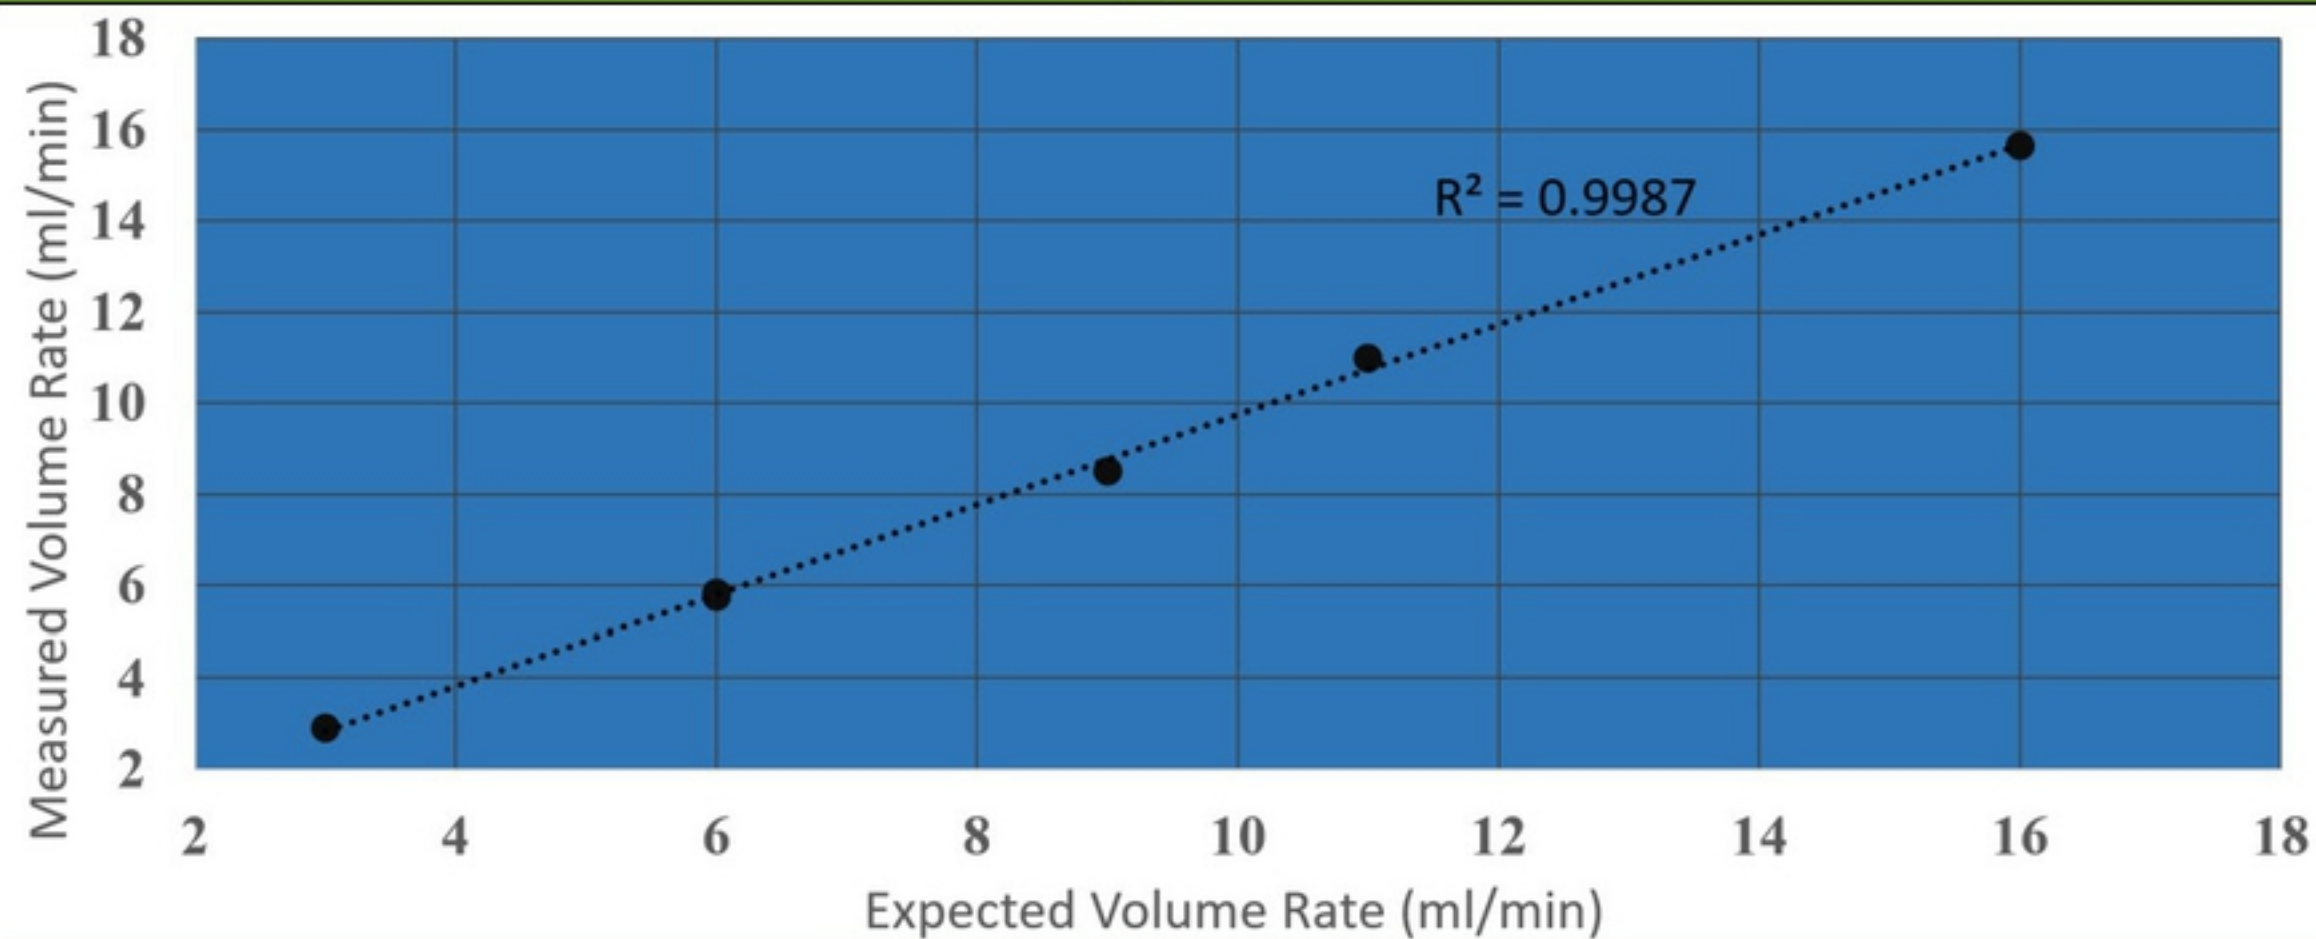

(c)

Figure 3

bioRxiv preprint doi: <https://doi.org/10.1101/2022.06.20.496802>; this version posted June 21, 2022. The copyright holder for this preprint (which was not certified by peer review) is the author/funder, who has granted bioRxiv a license to display the preprint in perpetuity. It is made available under aCC-BY 4.0 International license.

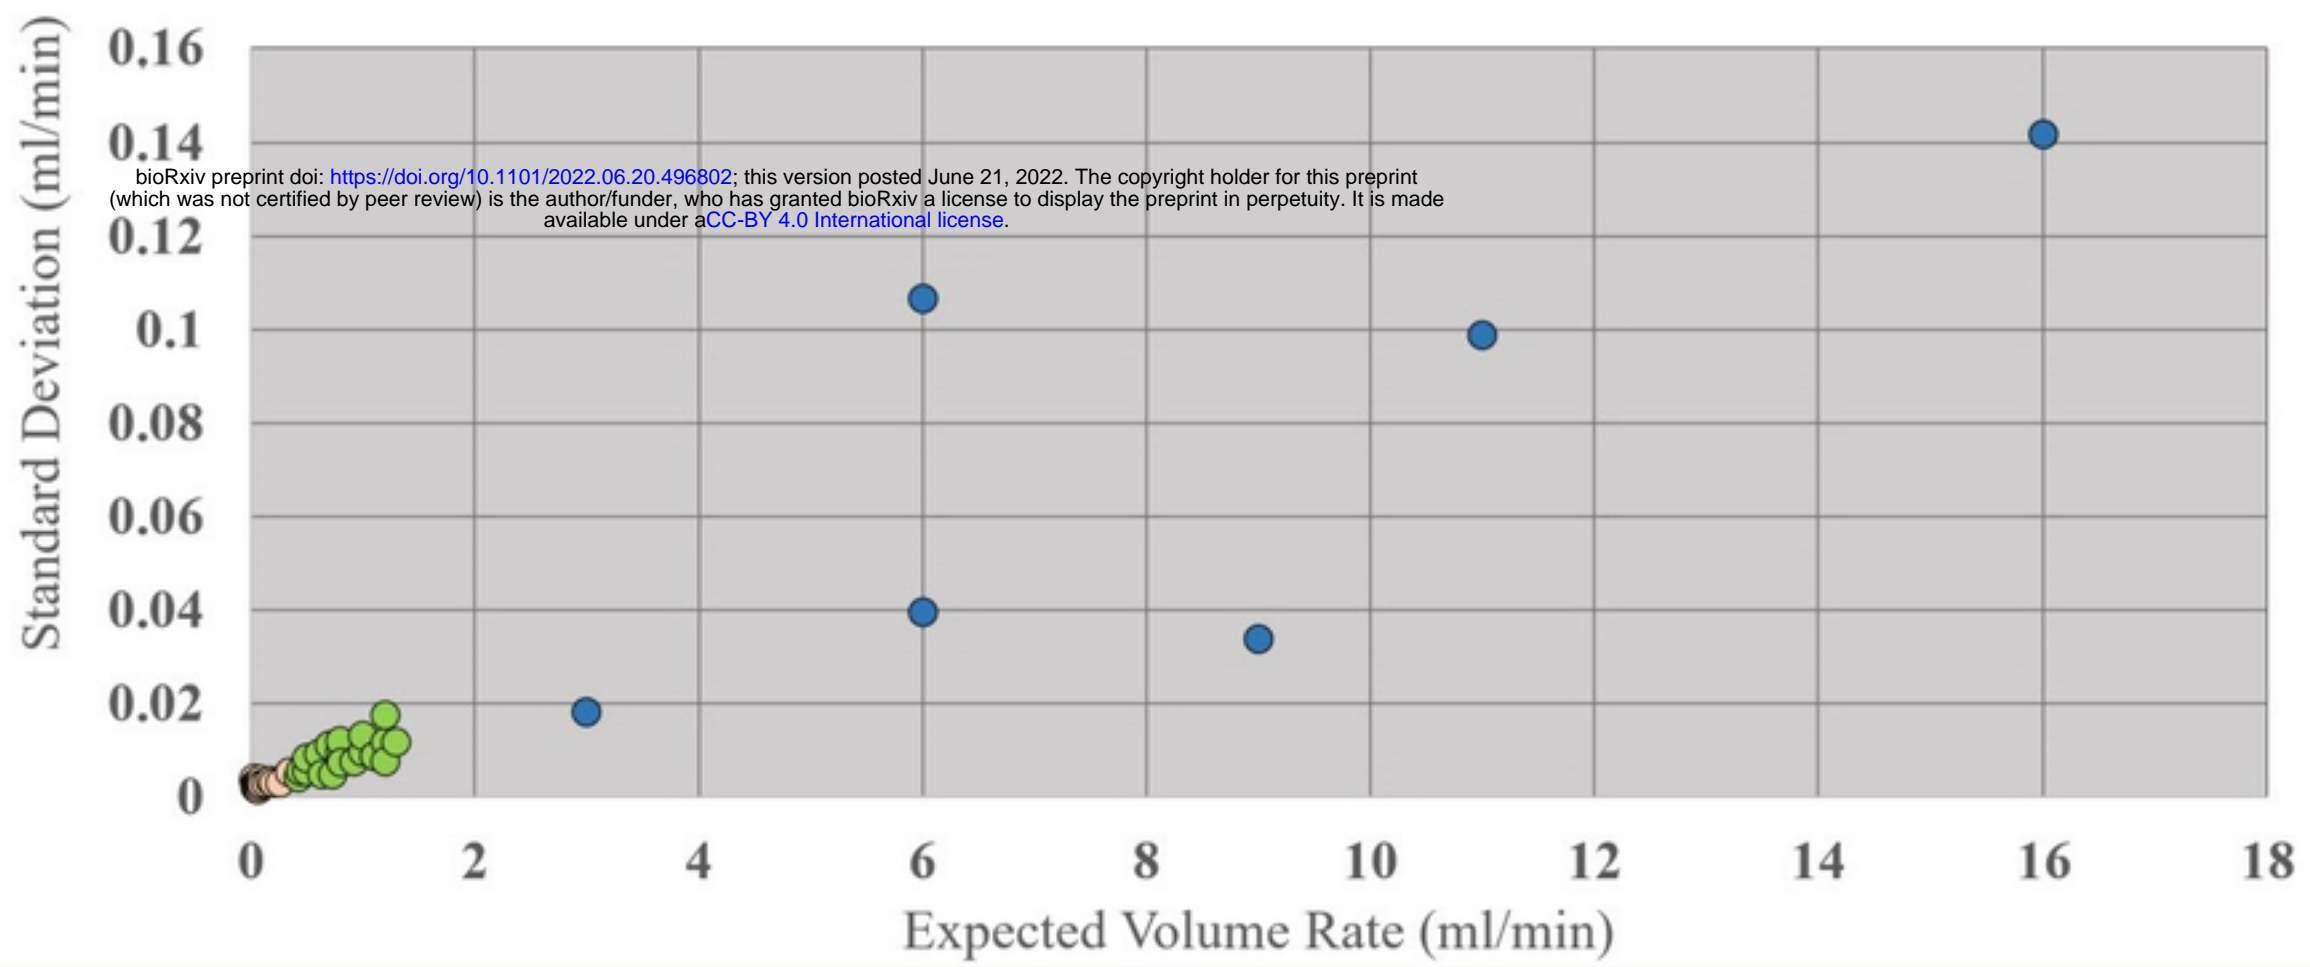

(a)

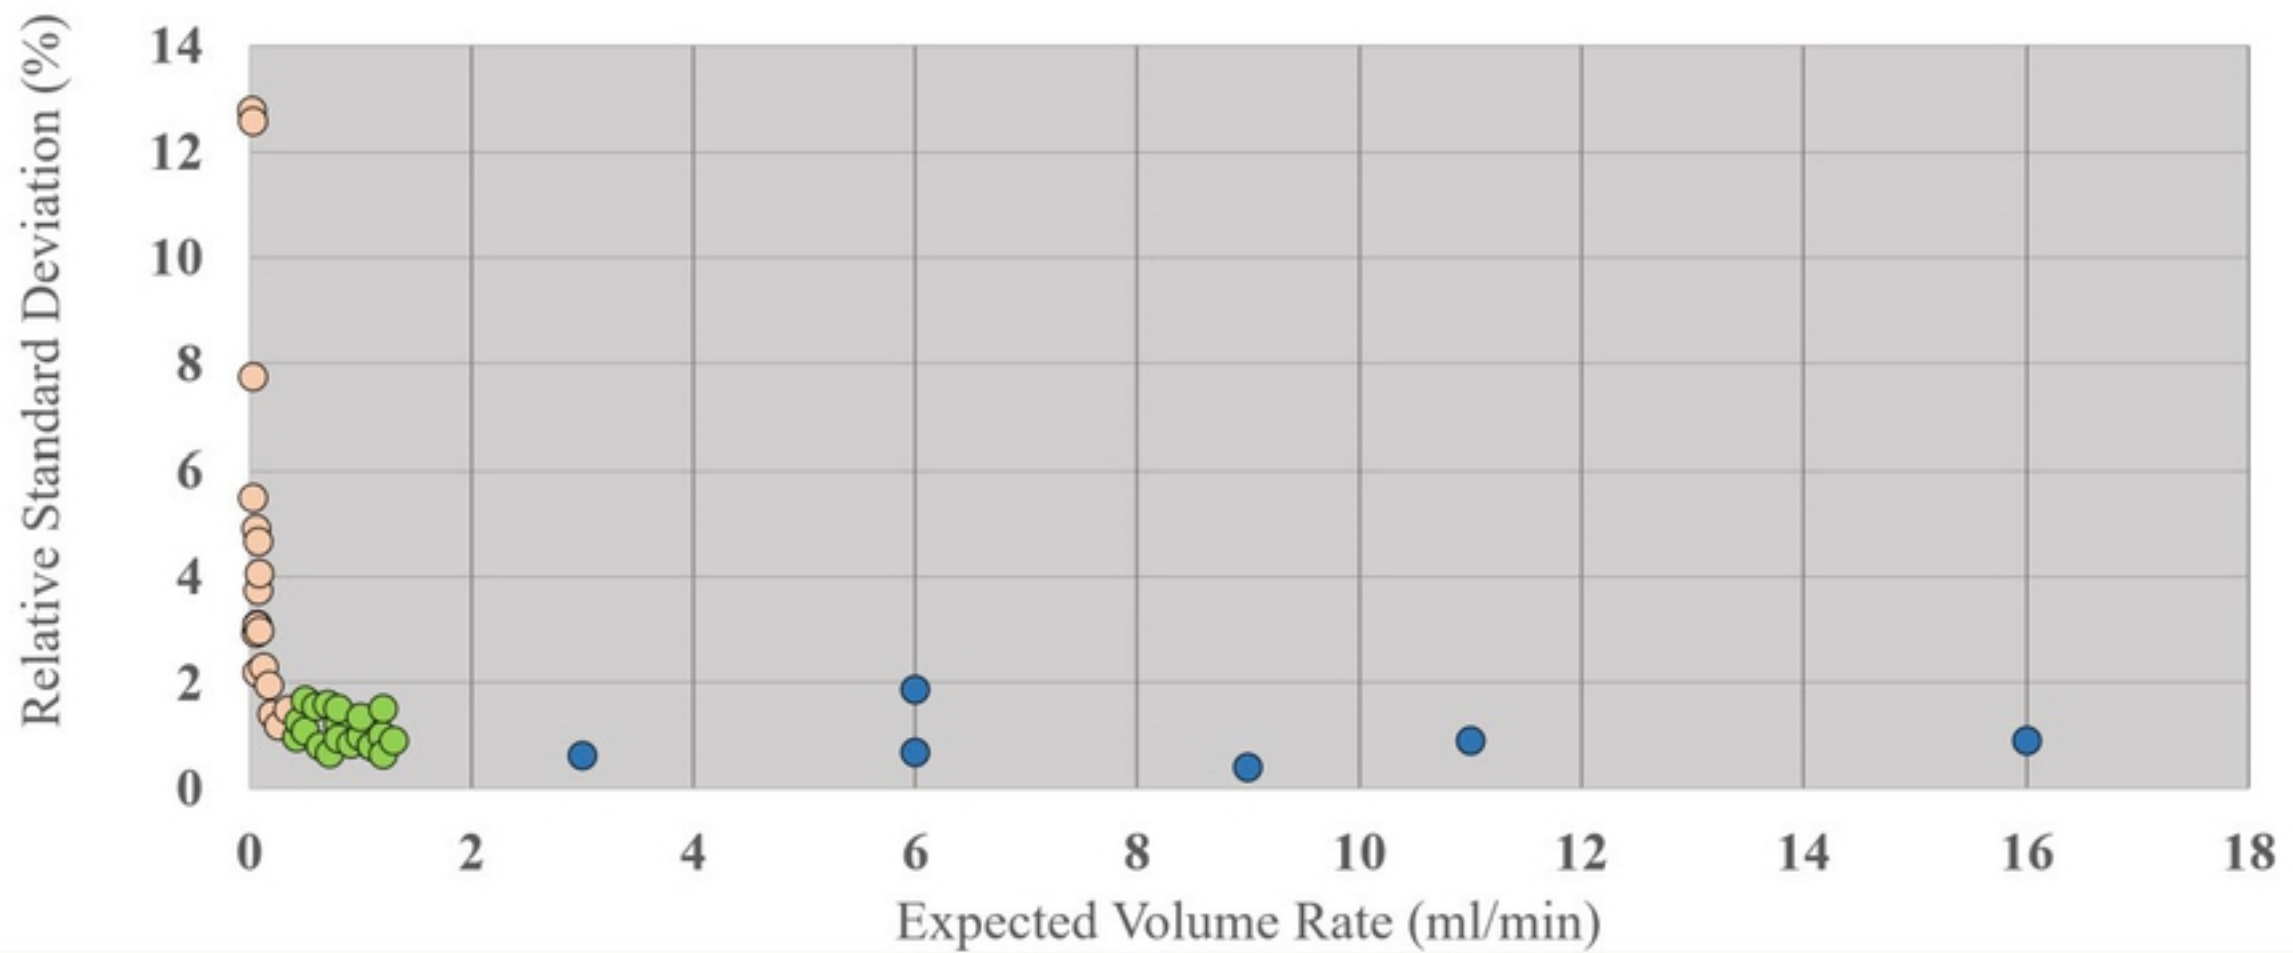

(b)

Figure 4

# Low Flow Ranges (0ml/min - 0.4ml/min)

bioRxiv preprint doi: <https://doi.org/10.1101/2022.06.20.496802>; this version posted June 21, 2022. The copyright holder for this preprint (which was not certified by peer review) is the author/funder, who has granted bioRxiv a license to display the preprint in perpetuity. It is made available under aCC-BY 4.0 International license.

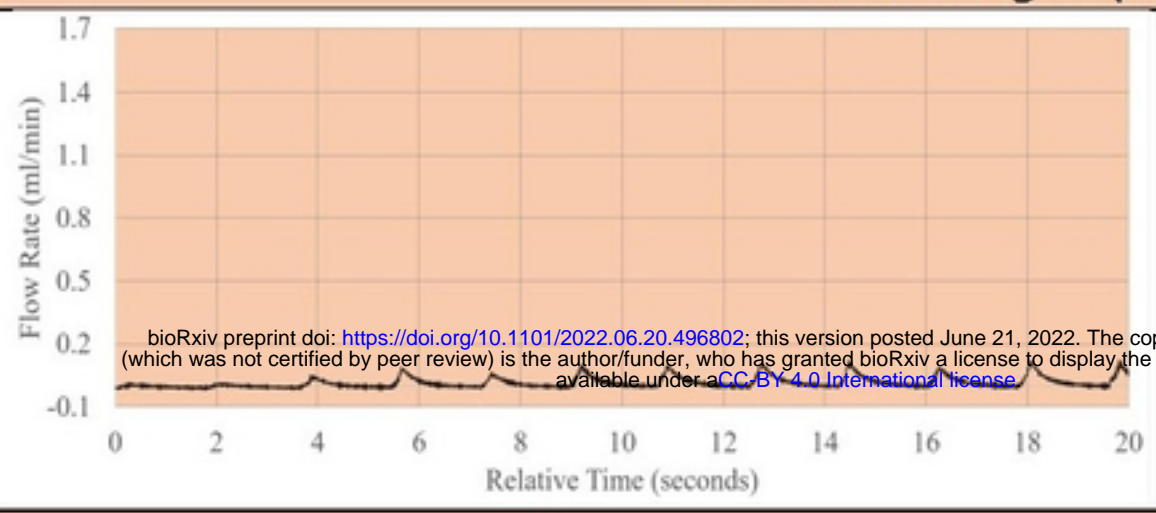

(a)

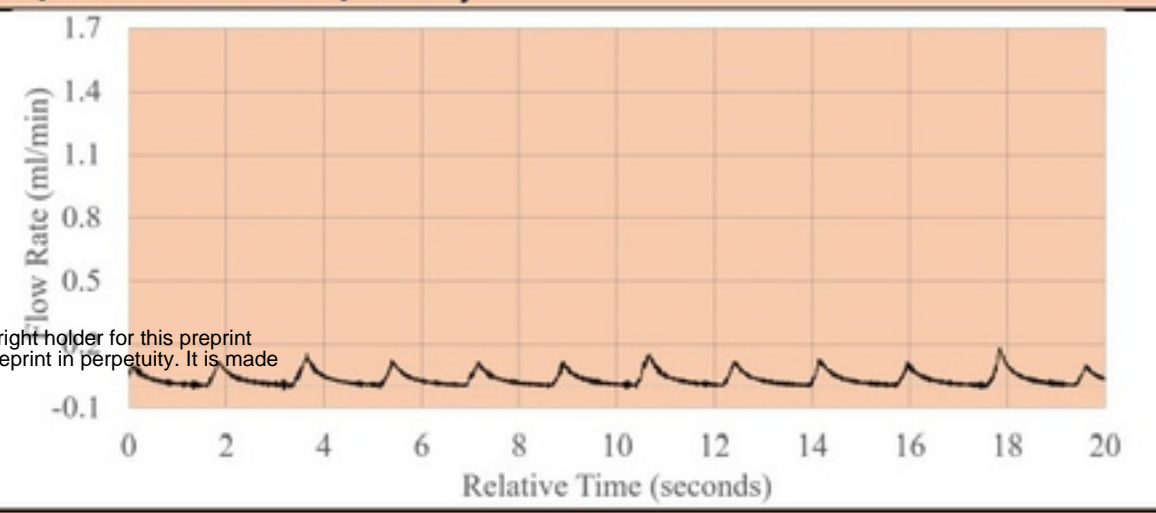

(b)

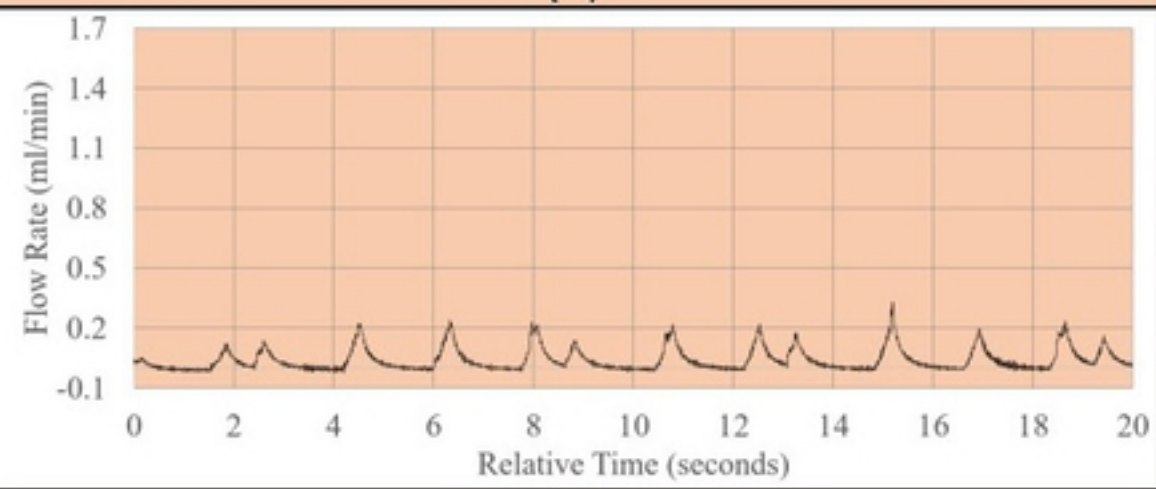

(c)

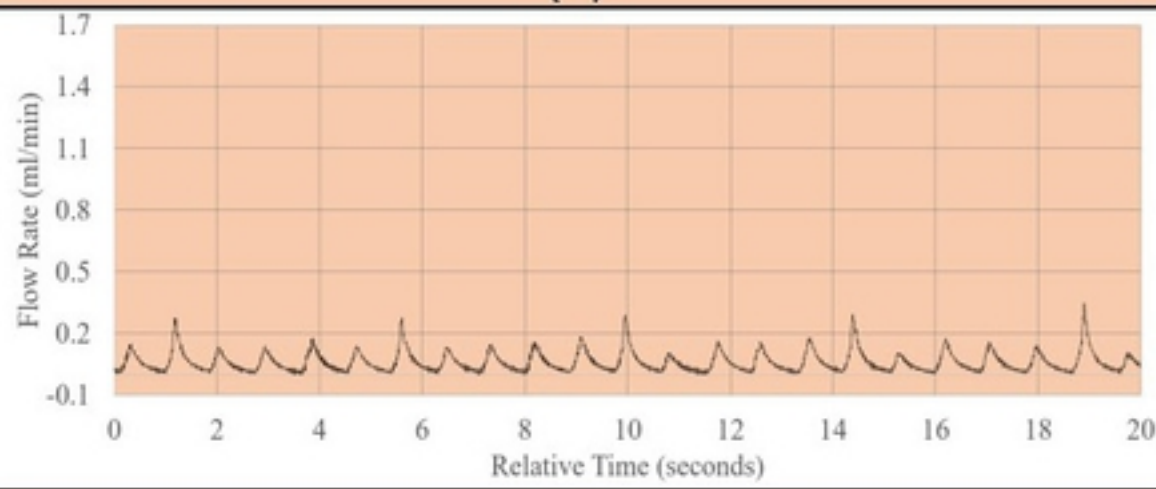

(d)

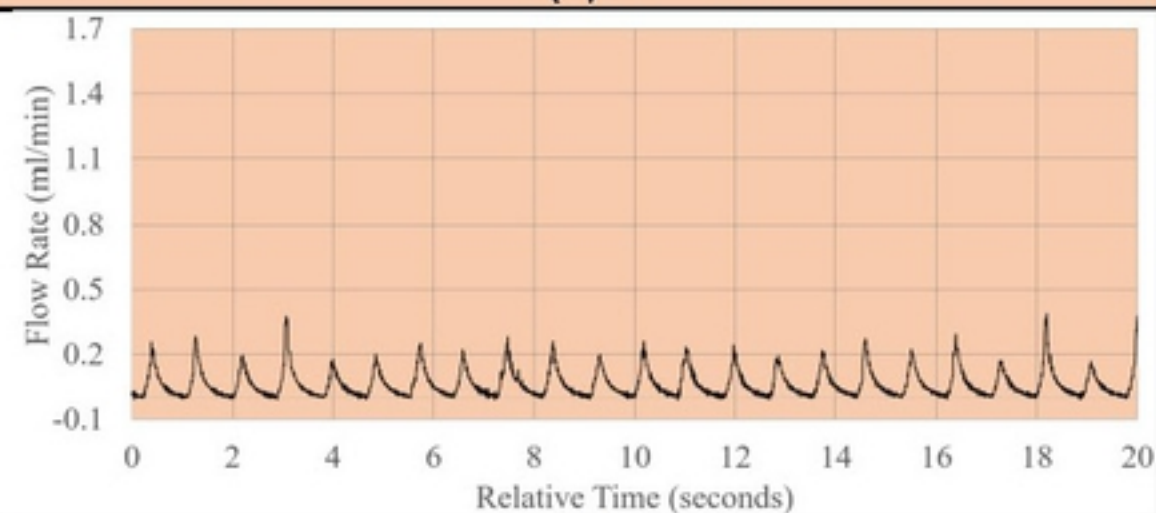

(e)

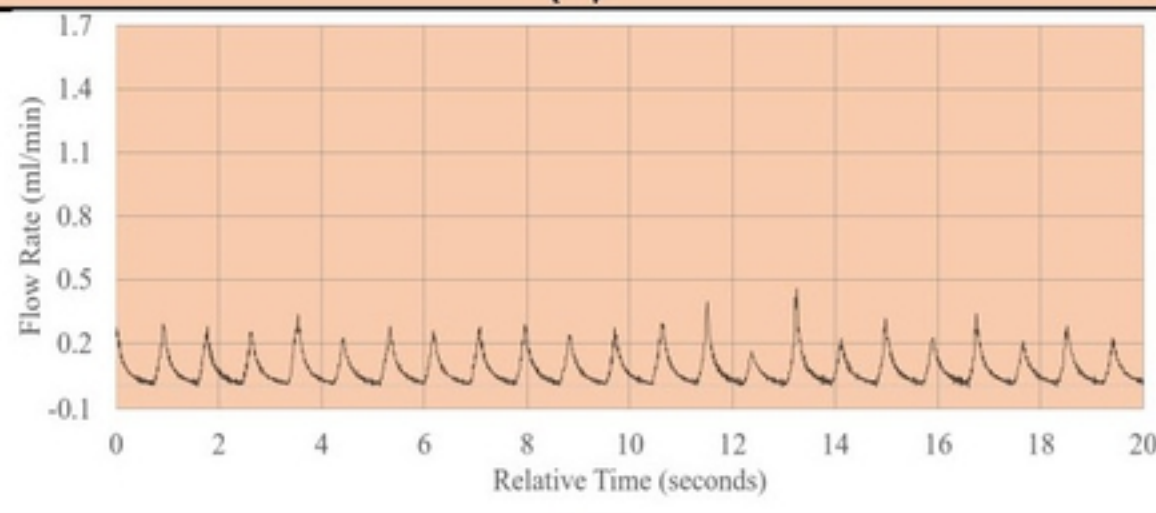

(f)

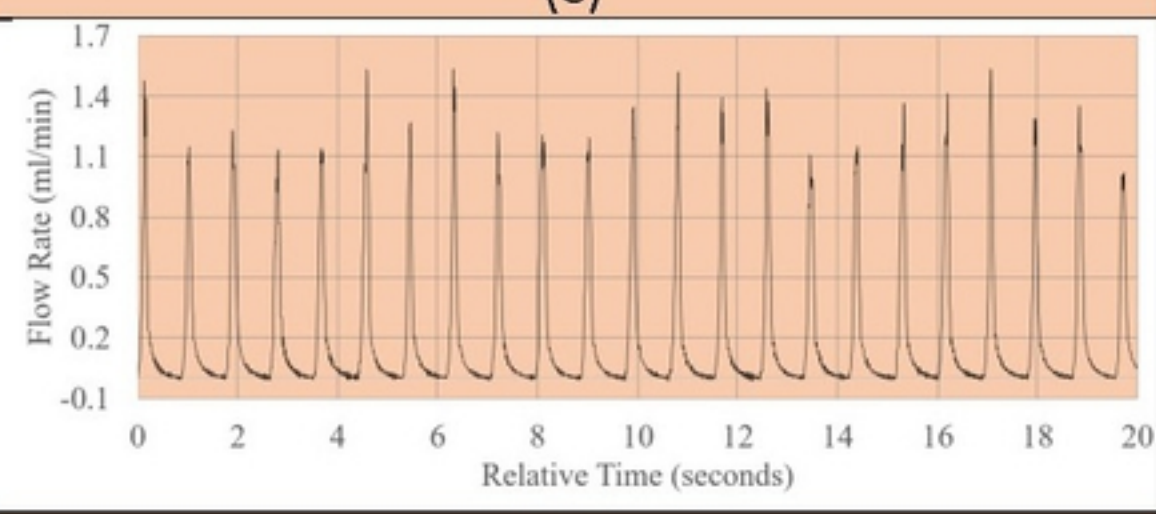

(g)

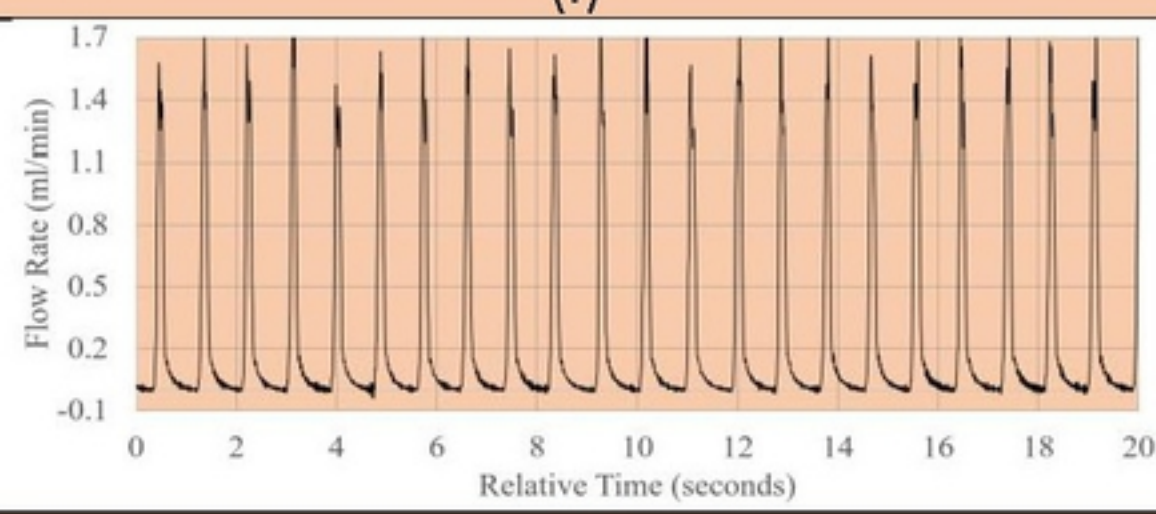

(h)

Figure 5

# Mid Flow Ranges (0.4ml/min – 1.4ml/min)

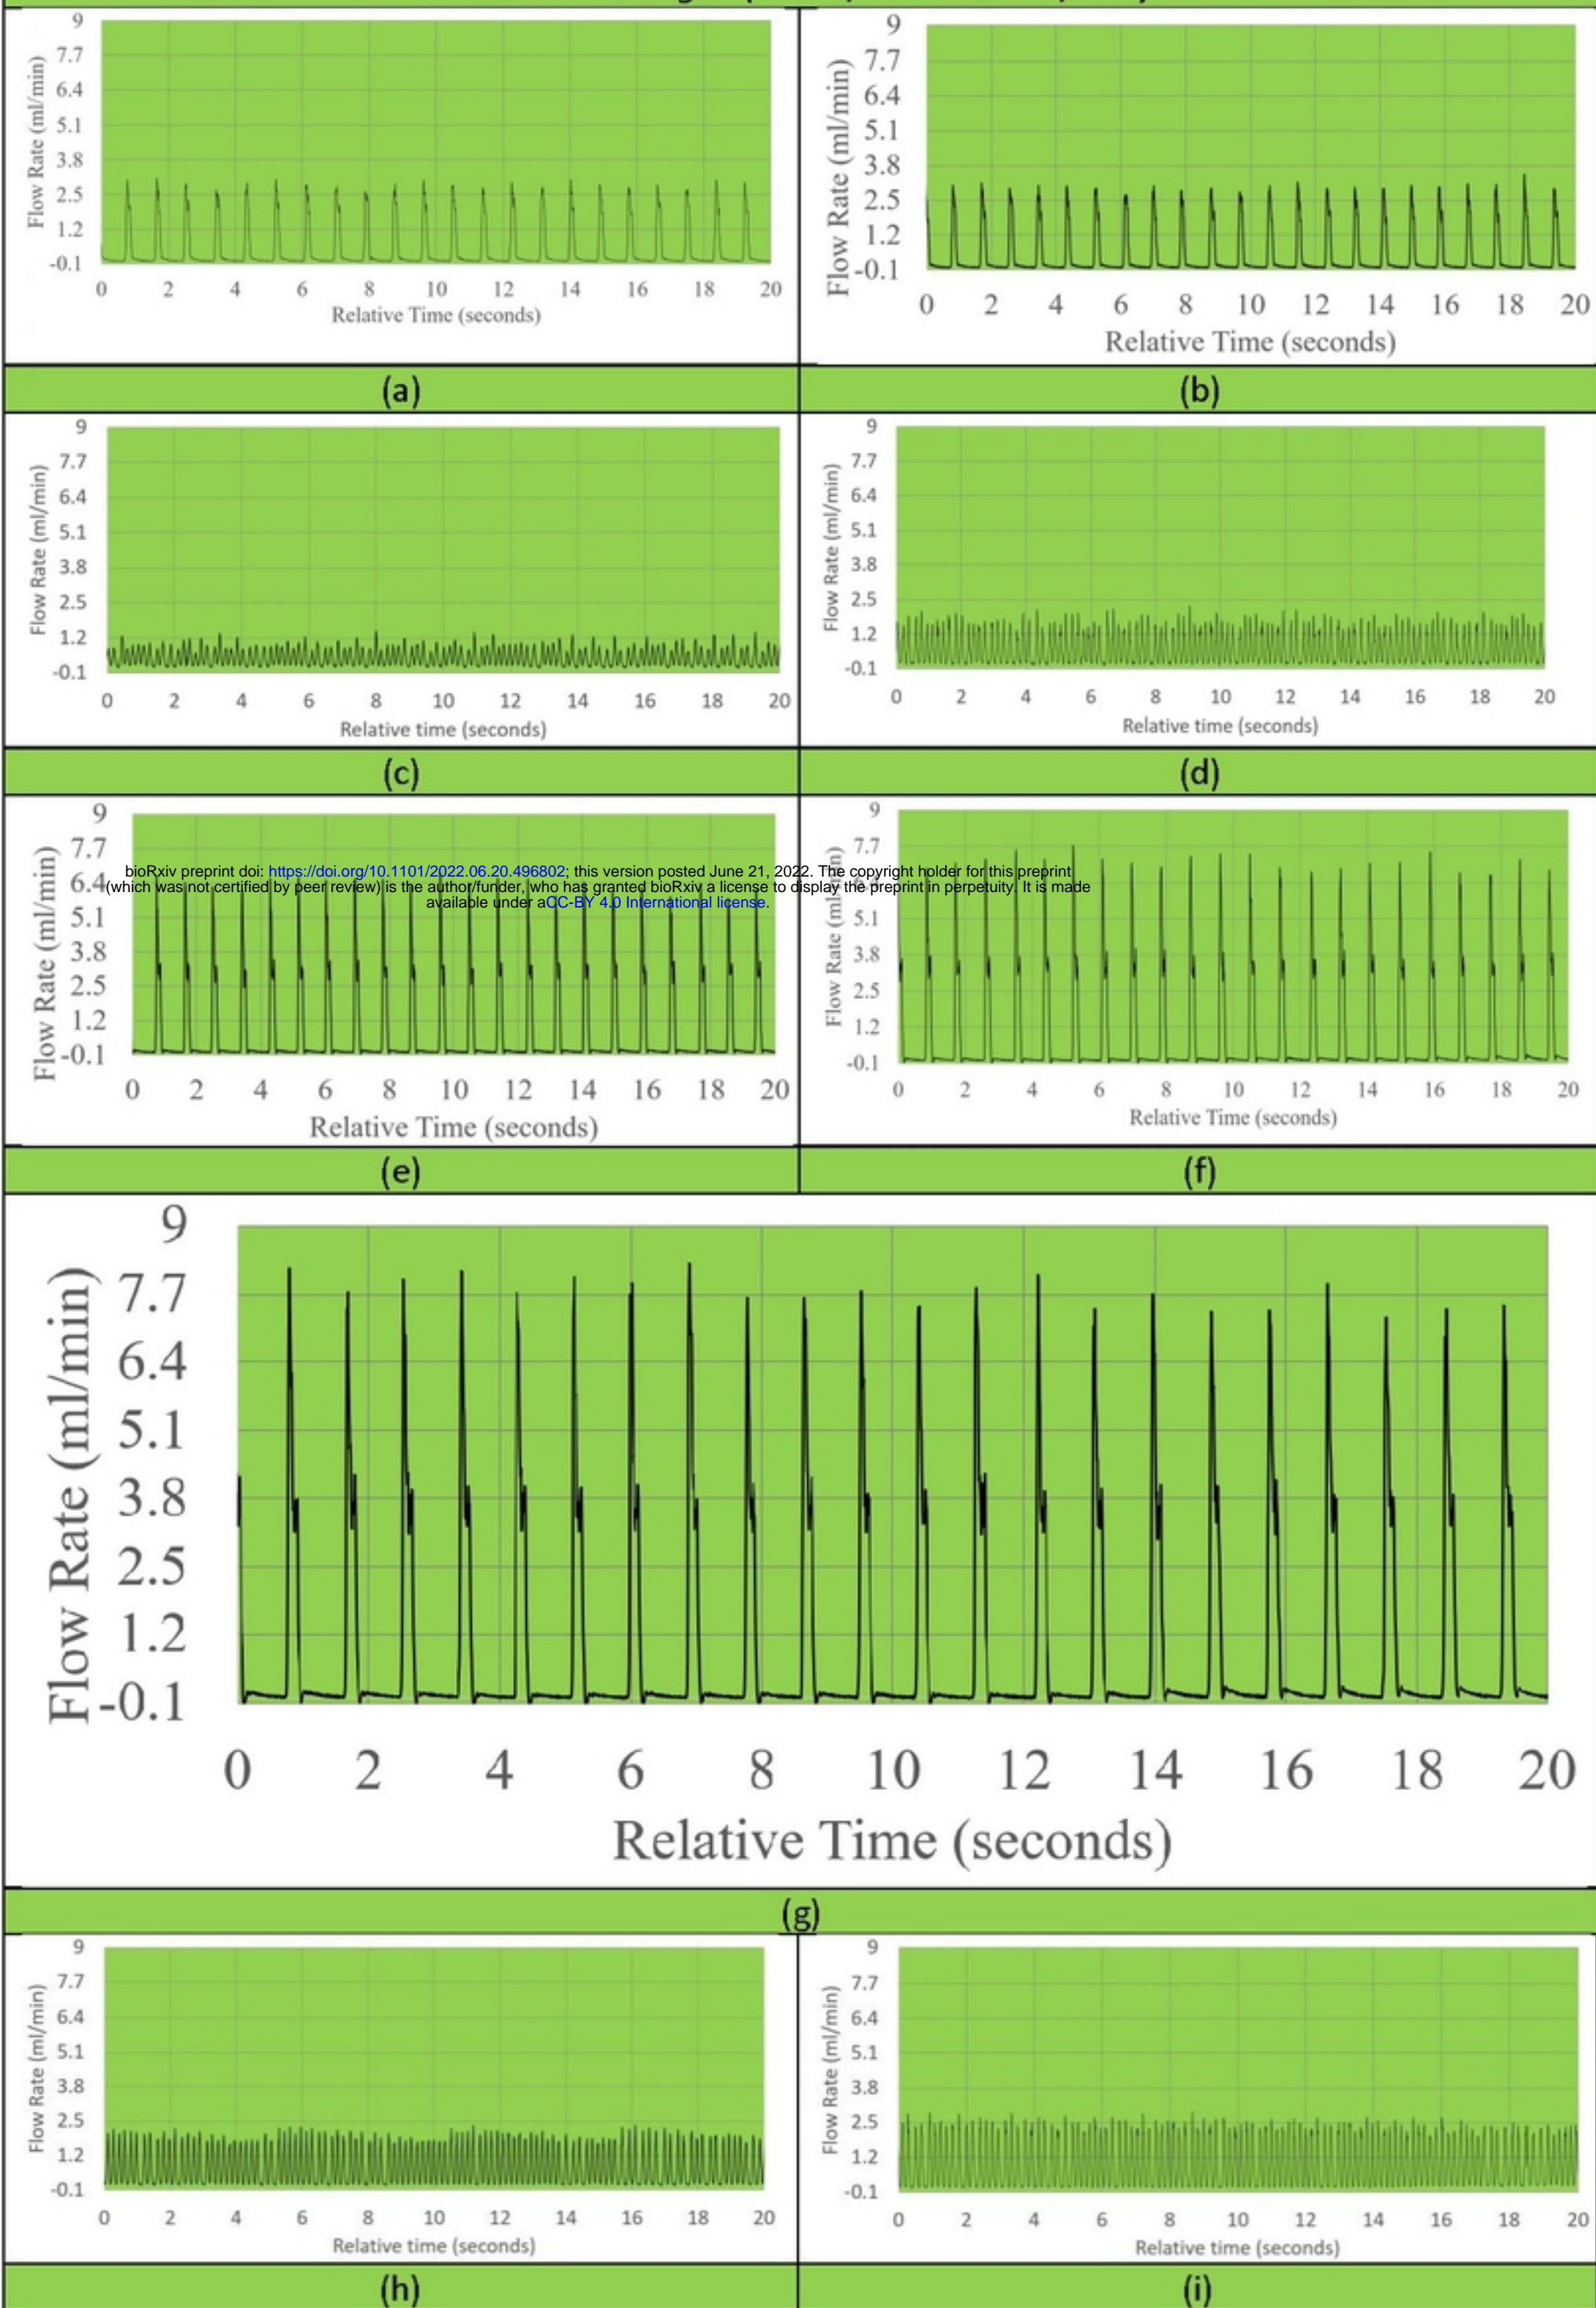

Figure 6

## High Flow Ranges (3ml/min – 16ml/min)

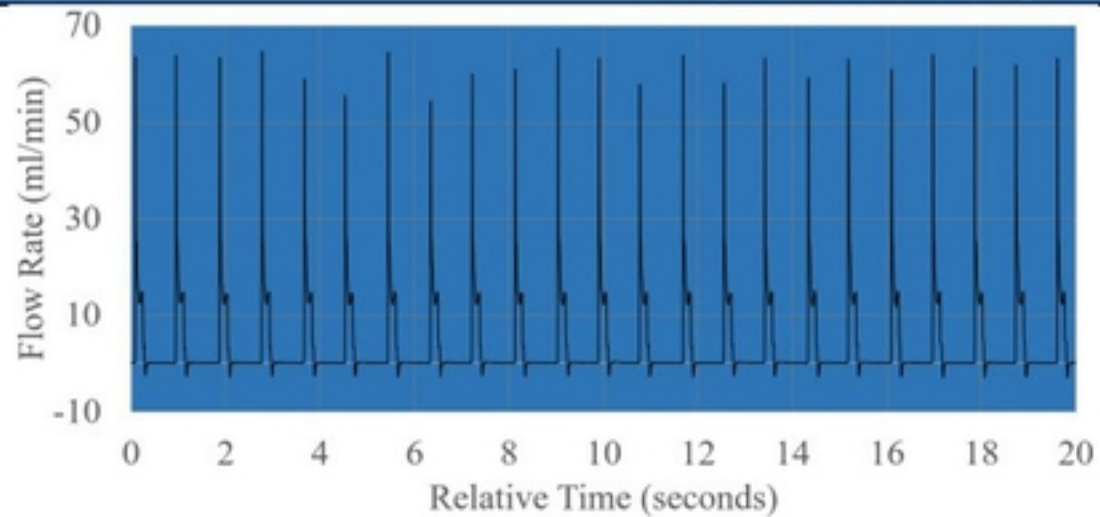

(a)

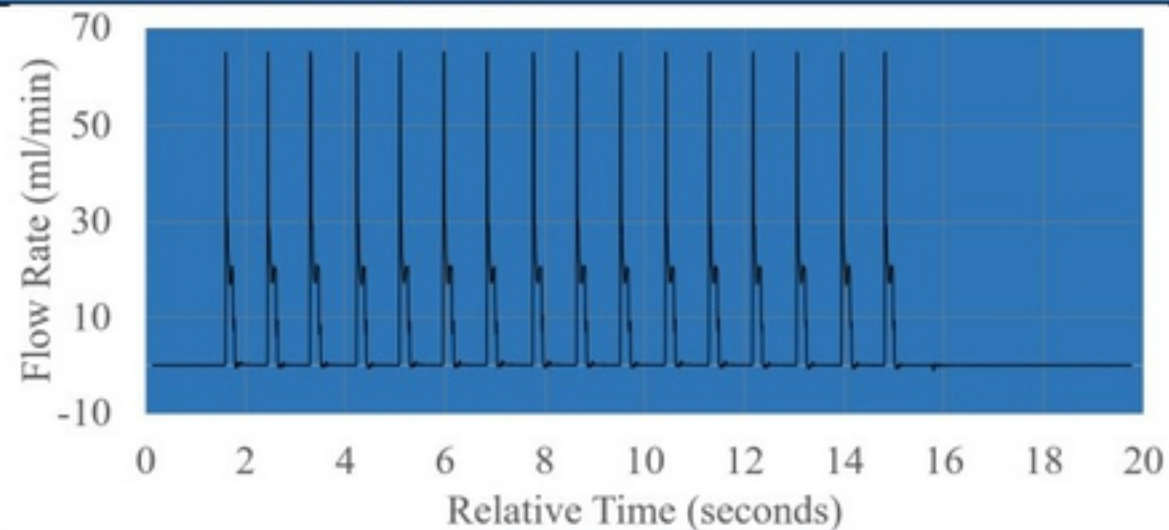

(b)

Figure 7



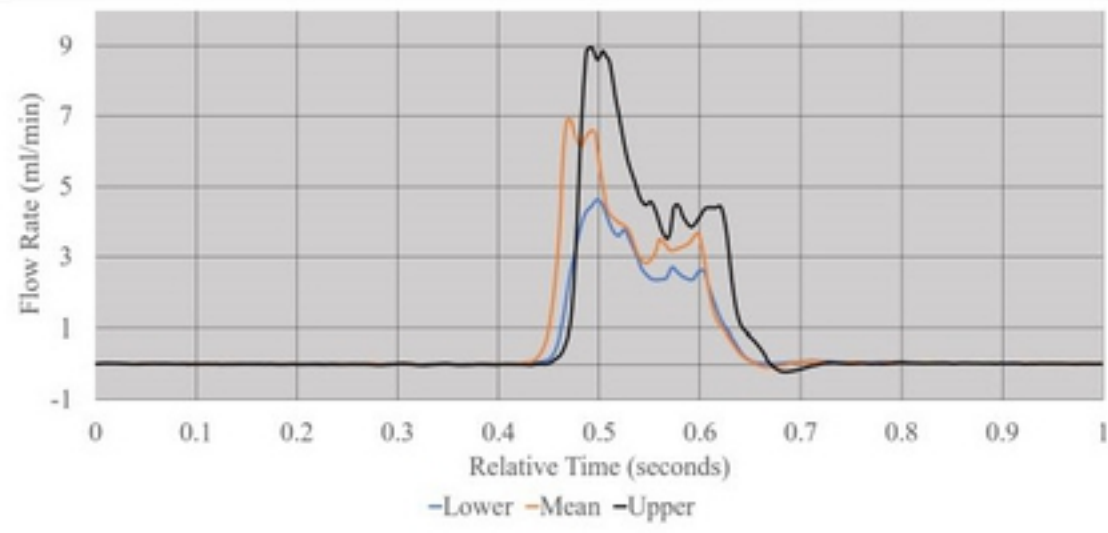

(a)

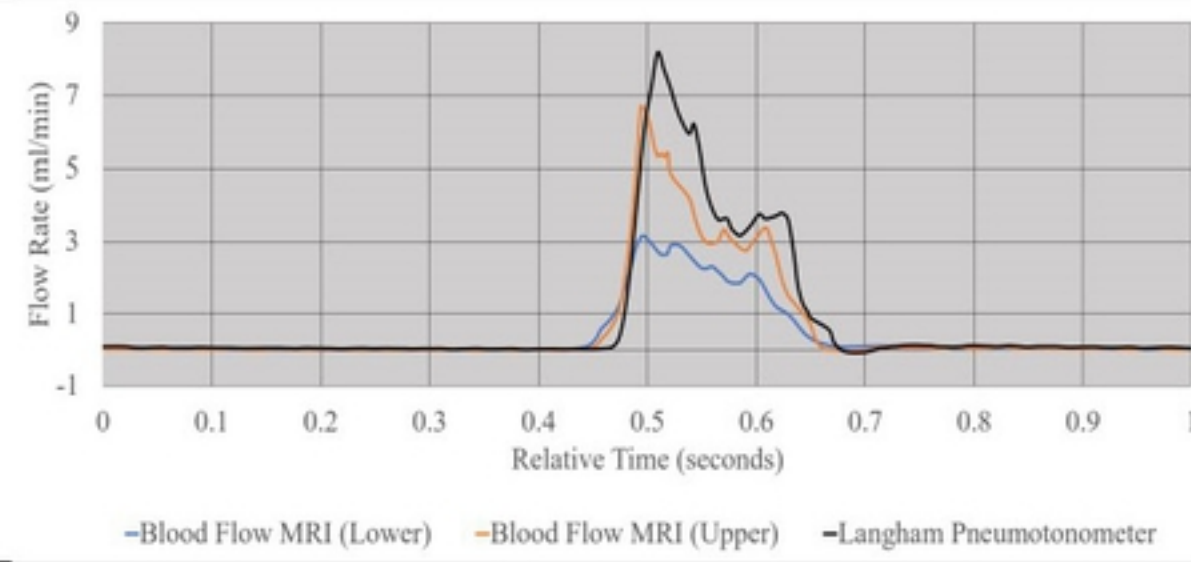

(b)

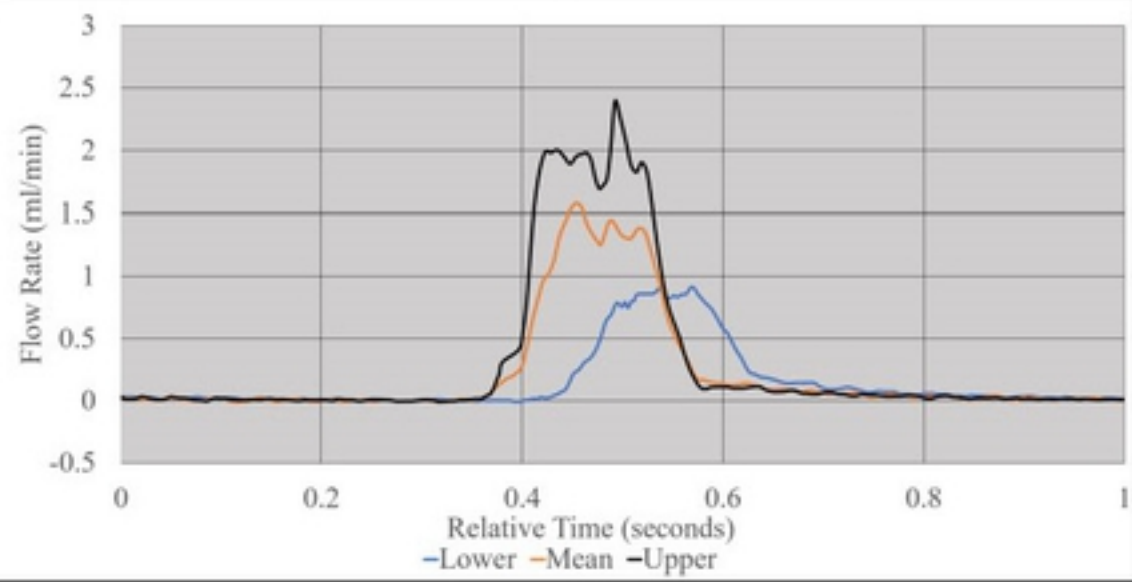

(c)

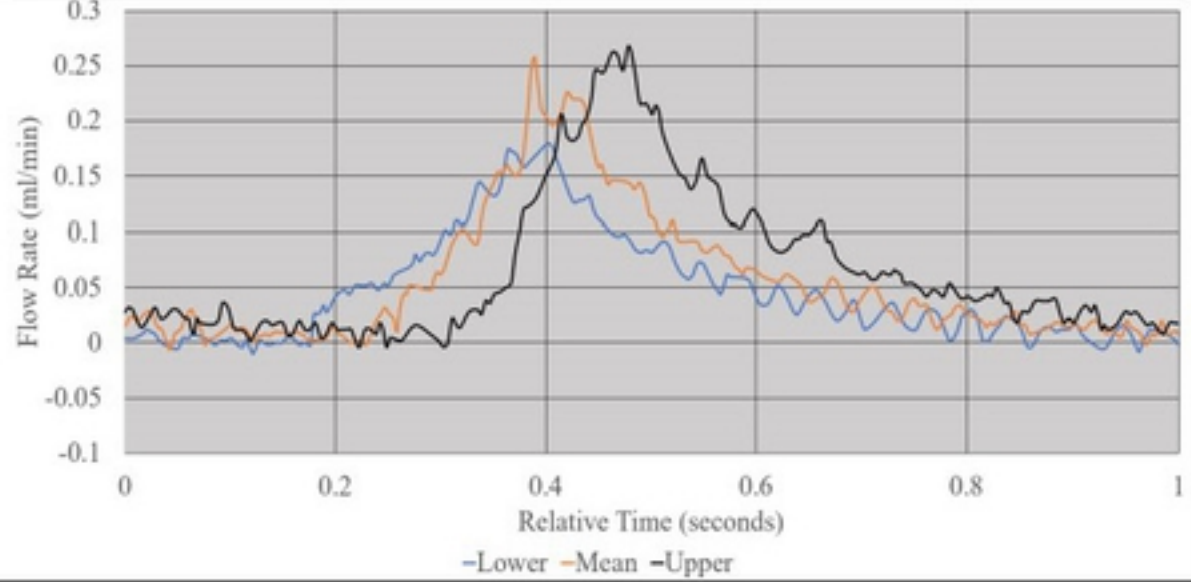

(d)

Figure 8

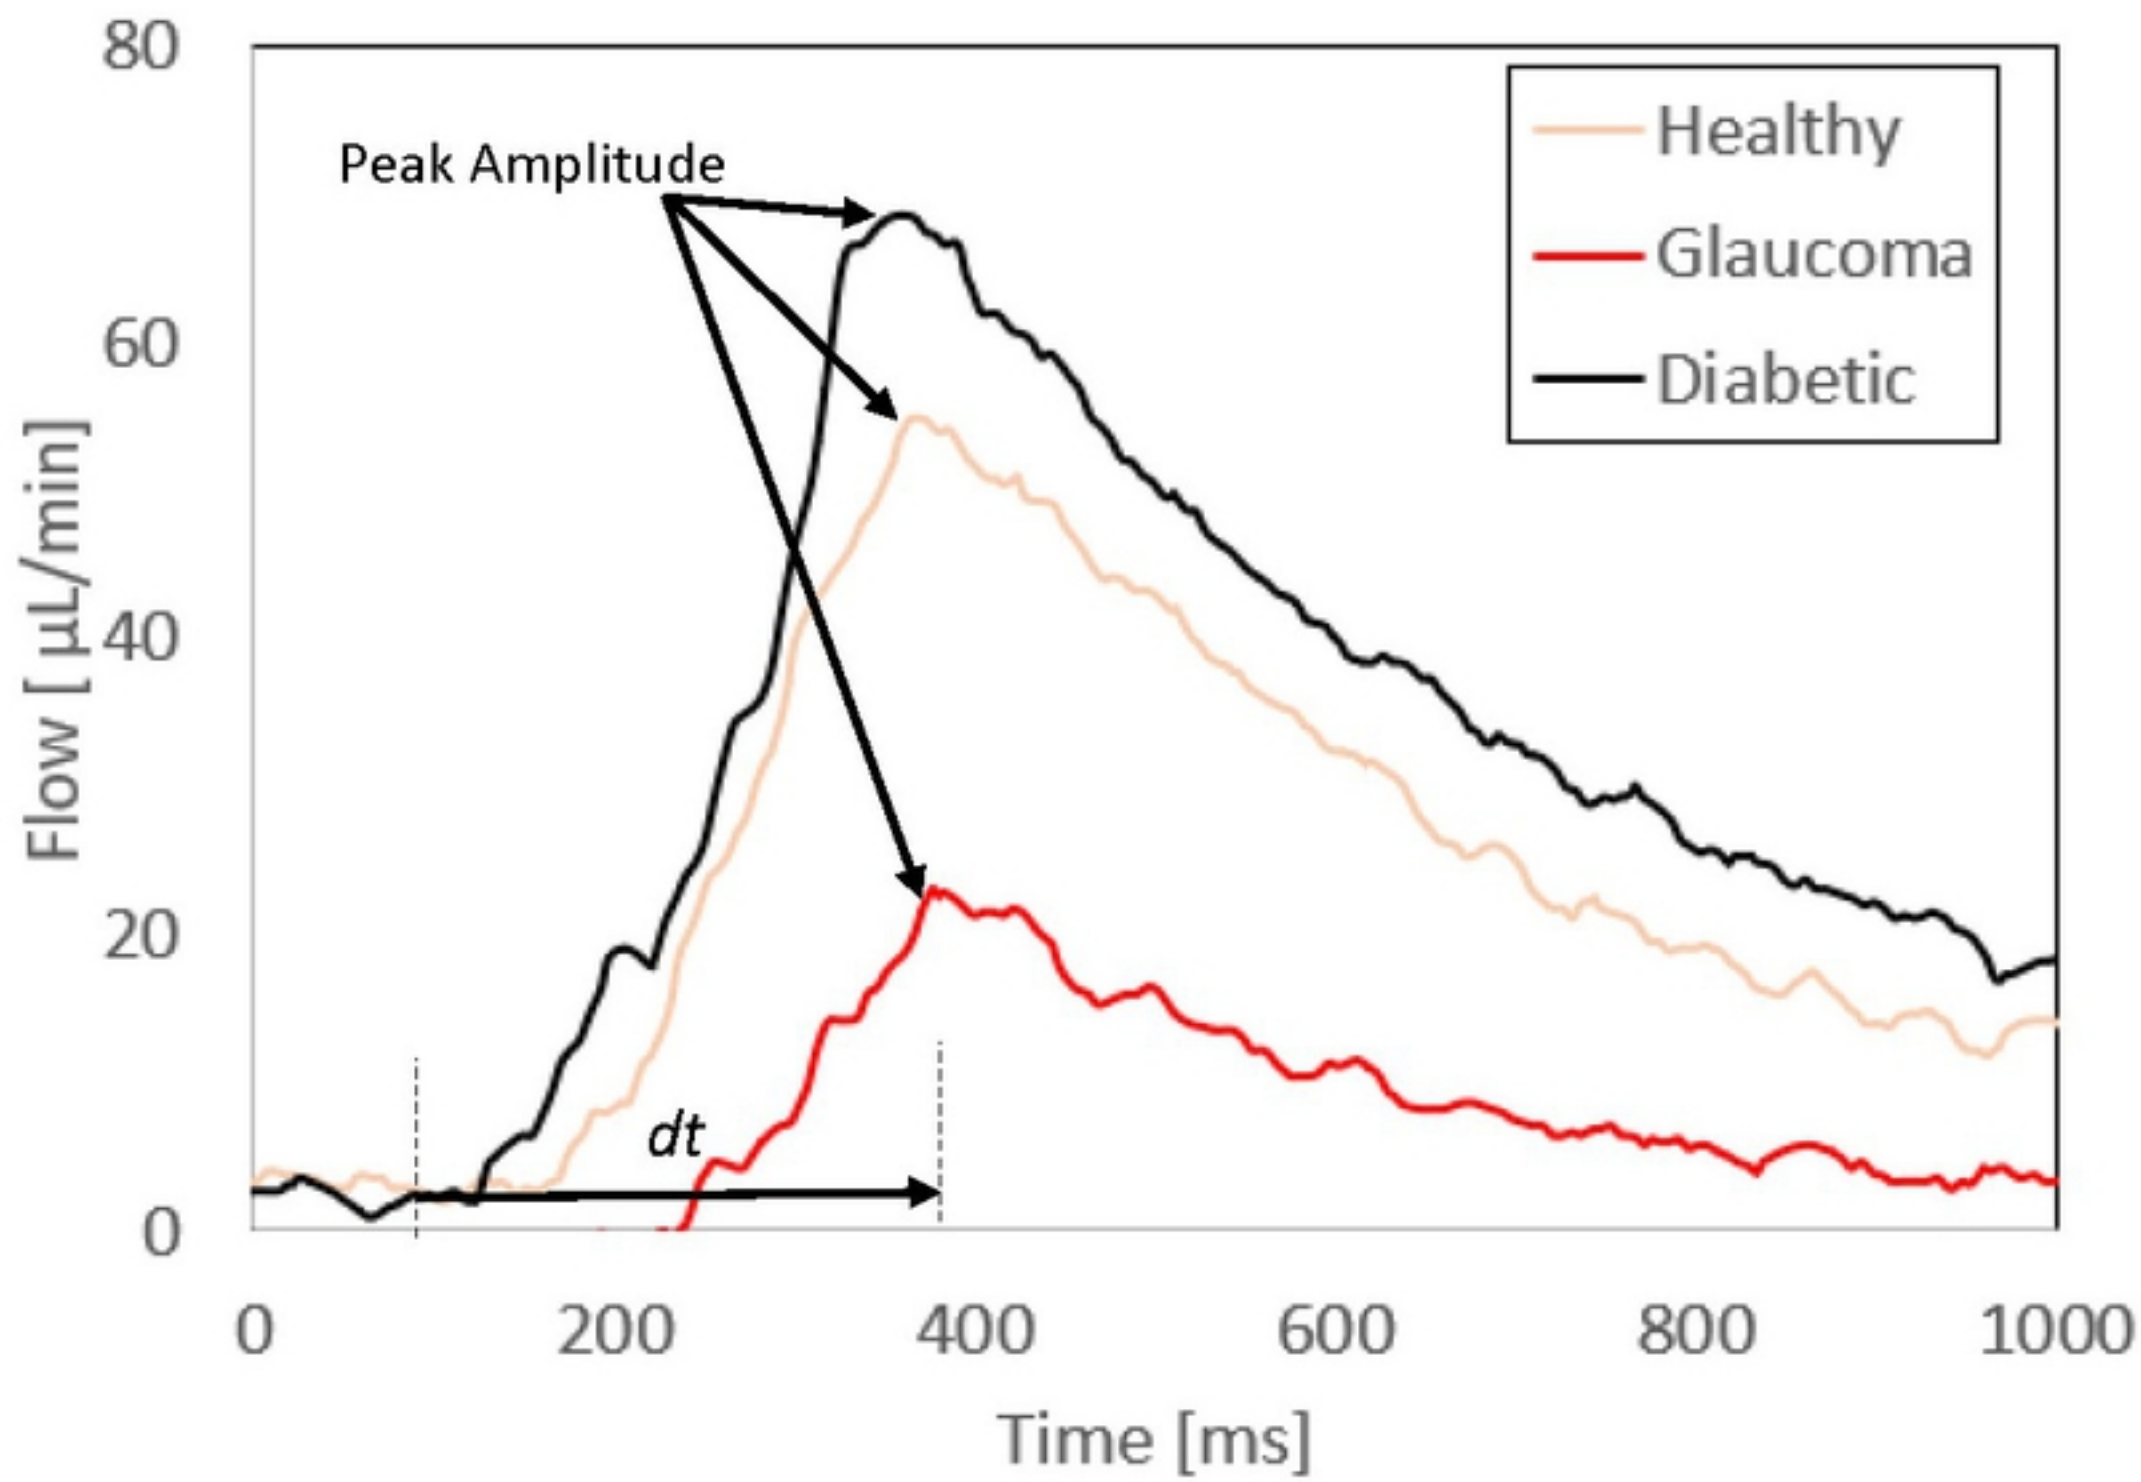

Figure 9
